# Supplementary material for: Teaching old tricks to new dogs – rational synthesis of multi-decker complexes featuring cyclo-P5 decks
Source: Royal Society of Chemistry journal article supplement (doi:10.1039/d3cc00898c), 2023-01-01
Supplement: d3cc00898c1.pdf [file d3cc00898c1.pdf]

# Teaching Old Tricks to New Dogs – Rational Synthesis of Multi-Decker Complexes Bearing *cyclo-P*<sub>5</sub> Decks

Christoph Riesinger, David Röhner, Ingo Krossing, Manfred Scheer\*

## *Supporting Information*

### **Author Contributions**

Christoph Riesinger – performing experimental work, writing of original draft.

David Röhner – performing experimental work (synthesis of **2-Co**).

Ingo Krossing – project administration, funding acquisition, co-writing final manuscript.

Manfred Scheer – project administration, funding acquisition, co-writing final manuscript.

All authors contributed in preparing the manuscript.

# Contents

|                                                               |    |
|---------------------------------------------------------------|----|
| 1. Synthesis and Analytical Data.....                         | 3  |
| 1.1. General Considerations .....                             | 3  |
| 1.2. 1-Cr .....                                               | 3  |
| 1.3. 1-Mn .....                                               | 4  |
| 1.4. 1-Fe.....                                                | 4  |
| 1.5. 1-Co .....                                               | 5  |
| 1.6. 1-Ni .....                                               | 5  |
| 1.7. 2-Fe.....                                                | 6  |
| 1.8. 2-Co .....                                               | 6  |
| 1.9. 3.....                                                   | 7  |
| 1.10. $[\text{Fe}(\text{tol})_2][\rho\text{f}]_2$ .....       | 7  |
| 2. Crystallographic Data .....                                | 8  |
| 2.1. General Consideration.....                               | 8  |
| 2.2. 1-Cr .....                                               | 10 |
| 2.3. 1-Mn .....                                               | 10 |
| 2.4. 1-Fe.....                                                | 11 |
| 2.5. 1-Ni .....                                               | 11 |
| 2.6. 2-Fe.....                                                | 12 |
| 2.7. 2-Co .....                                               | 12 |
| 2.8. 3.....                                                   | 13 |
| 2.9. $[\text{Fe}(\text{tol})_2][\rho\text{f}]_2$ .....        | 13 |
| 3. Spectroscopic Data.....                                    | 14 |
| 3.1. 1-Cr .....                                               | 14 |
| 3.2. 1-Mn .....                                               | 15 |
| 3.3. 1-Fe.....                                                | 16 |
| 3.4. 1-Co .....                                               | 17 |
| 3.5. 1-Ni .....                                               | 18 |
| 3.6. 2-Fe.....                                                | 19 |
| 3.7. 2-Co .....                                               | 20 |
| 3.8. 3.....                                                   | 21 |
| 3.9. $[\text{Fe}(\text{tol})_2][\rho\text{f}]_2$ .....        | 21 |
| 4. Computational Data .....                                   | 22 |
| 4.1. General Remarks .....                                    | 22 |
| 4.2. Spin Density Distribution and Energetic Comparison ..... | 22 |
| 4.3. Optimized Geometries .....                               | 23 |
| 4.4. References.....                                          | 36 |

# Synthesis and Analytical Data

## 1.1. General Considerations

All manipulations were carried out using standard Schlenk techniques at a Stock apparatus under N<sub>2</sub> as an inert gas or in a glove box with Ar atmosphere. All glassware was dried with a heat gun (600 °C) for at least 30 min prior to use. *o*-DFB (1,2-difluorobenzene) was distilled from P<sub>2</sub>O<sub>5</sub>, CD<sub>2</sub>Cl<sub>2</sub> was distilled from CaH<sub>2</sub> and other solvents were directly taken from an MBraun SPS-800 solvent purification system and degassed at room temperature. Solution <sup>1</sup>H (400.130 MHz), <sup>11</sup>B (128.432 MHz), <sup>19</sup>F (376.498 MHz) and <sup>31</sup>P (161.976 MHz) NMR spectra were recorded at an Avance400 (Bruker) spectrometer using (H<sub>3</sub>C)<sub>4</sub>Si (<sup>1</sup>H, <sup>13</sup>C), BF<sub>3</sub>·OEt<sub>2</sub> (<sup>11</sup>B) CFC<sub>3</sub> (<sup>19</sup>F) or 85% phosphoric acid (<sup>31</sup>P), respectively, as external standards. Chemical shifts ( $\delta$ ) are provided in parts per million (ppm) and coupling constants (*J*) are reported in Hertz (Hz). The following abbreviations are used: s = singlet, d = doublet, dd = doublet of doublets, dt = doublet of triplets, t = triplet, td = triplet of doublets br = broad and m = multiplet. Mass spectra were recorded at the internal mass spectrometry department using a ThermoQuest Finnigan TSQ 7000 (ESI) or Finnigan MAT 95 (LIFDI) mass spectrometer or by the first author on a Waters Micromass LCT ESI-TOF mass-spectrometer and peak assignment was performed using the Molecular weight calculator 6.50. Elemental analysis of the products was conducted by the elemental analysis department at the University of Regensburg using an Elementar Vario EL. The starting materials [Cp\*Fe( $\eta^5$ -P<sub>5</sub>)],<sup>1</sup> [Cp\*Fe( $\eta^5$ -As<sub>5</sub>)],<sup>2</sup> [Cp\*\*M( $\mu$ -X)]<sub>2</sub> (M = Cr,<sup>3</sup> Mn,<sup>4</sup> Fe,<sup>5</sup> Co,<sup>6</sup> Ni,<sup>7</sup> X = Cl, Br), K[BAR<sup>F</sup>],<sup>8</sup> Ti[*pf*]<sup>9</sup> and [Co(*o*-dfb)<sub>2</sub>][*pf*]<sup>10</sup> were synthesized according to literature procedures. All other chemicals were purchased from commercial vendors and used without further purification.

## 1.2. 1-Cr

A dark blue solution of [Cp\*\*Cr( $\mu$ -Cl)]<sub>2</sub> (64 mg, 0.1 mmol, 1 eq.) in 6 mL of *o*-DFB was added to a dark green solution of [Cp\*Fe( $\eta^5$ -P<sub>5</sub>)] (70 mg, 0.2 mmol, 2 eq.) and K[BAR<sup>F</sup>] (144 mg, 0.2 mmol, 2 eq.) in 6 mL of *o*-DFB. A rapid colour change to red and formation of a colourless solid was observed and the reaction was completed by stirring the solution at room temperature for 1 h. Afterwards the solution was filtered, constricted to 3 mL and layered with 15 mL of *n*-hexane. Storage of this mixture at room temperature for 4 days yielded dark red plate shaped crystals of [Cp\*Fe( $\mu$ ;  $\eta^{5-5}$ -P<sub>5</sub>)CrCp\*\*][BAR<sup>F</sup>] (**1-Cr**), which were isolated by decanting the solvent and drying under reduced pressure (10<sup>-3</sup> mbar).

|                                                                                 |                                                                                                                                                                                                                                                                         |
|---------------------------------------------------------------------------------|-------------------------------------------------------------------------------------------------------------------------------------------------------------------------------------------------------------------------------------------------------------------------|
| Yield:                                                                          | 140 mg (0.12 mmol, 60%)                                                                                                                                                                                                                                                 |
| Elemental Analysis:                                                             | calculated (%) for [Cp*Fe( $\mu$ ; $\eta^{5-5}$ -P <sub>5</sub> )CrCp**][BAR <sup>F</sup> ]:<br>C: 46.72 H: 3.38, found: C: 47.17 H: 3.24                                                                                                                               |
| ESI(+)-MS ( <i>o</i> -DFB):                                                     | <i>m/z</i> (%) = 631.3 (100, [ <b>1-Cr</b> ] <sup>+</sup> )                                                                                                                                                                                                             |
| <sup>1</sup> H-NMR (CD <sub>2</sub> Cl <sub>2</sub> , 300 K):                   | $\delta$ ppm = 1.10 (s, 9 H, <sup>t</sup> Bu <sub>3</sub> C <sub>5</sub> H <sub>2</sub> ), 1.26 (s, 18 H, <sup>t</sup> Bu <sub>3</sub> C <sub>5</sub> H <sub>2</sub> ), 1.53 (s, 15 H, Cp*), 4.41 (s, 2 H, <sup>t</sup> Bu <sub>3</sub> C <sub>5</sub> H <sub>2</sub> ) |
| <sup>31</sup> P{ <sup>1</sup> H}-NMR (CD <sub>2</sub> Cl <sub>2</sub> , 300 K): | $\delta$ ppm = 14.2 ppm (s, <i>cyclo</i> -P <sub>5</sub> )                                                                                                                                                                                                              |
| <sup>31</sup> P-NMR (CD <sub>2</sub> Cl <sub>2</sub> , 300 K):                  | $\delta$ ppm = 14.2 ppm (s, <i>cyclo</i> -P <sub>5</sub> )                                                                                                                                                                                                              |
| <sup>19</sup> F{ <sup>1</sup> H}-NMR (CD <sub>2</sub> Cl <sub>2</sub> , 300 K): | $\delta$ ppm = - 167.3 (br, 8 F, [BAR <sup>F</sup> ] <sup>-</sup> ), - 163.4 (br, 4 F, [BAR <sup>F</sup> ] <sup>-</sup> ), - 133.0 (br, 8 F, [BAR <sup>F</sup> ] <sup>-</sup> )                                                                                         |
| <sup>11</sup> B{ <sup>1</sup> H}-NMR (CD <sub>2</sub> Cl <sub>2</sub> , 300 K): | $\delta$ ppm = - 16.9 ppm (s, [BAR <sup>F</sup> ] <sup>-</sup> )                                                                                                                                                                                                        |

### 1.3. 1-Mn

[Cp<sup>'''</sup>Mn(thf)(μ-Cl)]<sub>2</sub> (79 mg, 0.1 mmol, 1 eq.), [Cp\*Fe(η<sup>5</sup>-P<sub>5</sub>)] (70 mg, 0.2 mmol, 2 eq.) and Ti[*pf*] (234 mg, 0.2 mmol, 2 eq.) were suspended in 4 mL of *o*-DFB to afford a clear green solution and formation of a colourless precipitate. The solution was stirred for 17 h and the solvent was removed under reduced pressure (10<sup>-3</sup> mbar). 3 mL of CH<sub>2</sub>Cl<sub>2</sub> were added to the mixture and the solution was then filtered. The now green solution was layered with 20 mL of *n*-hexane. Storage of this mixture for 2 weeks yielded dark green block shaped crystals of [Cp\*Fe(μ;η<sup>5:5</sup>-P<sub>5</sub>)MnCp<sup>'''</sup>][*pf*] (**1-Mn**). As the formation of a polymeric coordination compound of [Cp\*Fe(η<sup>5</sup>-P<sub>5</sub>)] and Ti[*pf*] during this reaction cannot be suppressed, the product has to be isolated by mechanical separation of the crystals of **1-Mn**, which results in decreased yields.

|                                                                                 |                                                                                                                                             |
|---------------------------------------------------------------------------------|---------------------------------------------------------------------------------------------------------------------------------------------|
| Yield:                                                                          | 65 mg (0.04 mmol, 20%)                                                                                                                      |
| Elemental Analysis:                                                             | calculated (%) for [Cp*Fe(μ;η <sup>5:5</sup> -P <sub>5</sub> )MnCp <sup>'''</sup> ][ <i>pf</i> ]: C: 32.25 H: 2.77, found: C: 32.21 H: 2.97 |
| ESI(+)-MS ( <i>o</i> -DFB):                                                     | <i>m/z</i> (%) = 634.0 (100, [ <b>1-Mn</b> ] <sup>+</sup> )                                                                                 |
| <sup>1</sup> H-NMR (CD <sub>2</sub> Cl <sub>2</sub> , 300 K):                   | δ ppm = broad signal between 1 – 3 ppm                                                                                                      |
| <sup>31</sup> P{ <sup>1</sup> H}-NMR (CD <sub>2</sub> Cl <sub>2</sub> , 300 K): | δ ppm = no signal observed between +/-500 ppm                                                                                               |
| <sup>19</sup> F{ <sup>1</sup> H}-NMR (CD <sub>2</sub> Cl <sub>2</sub> , 300 K): | δ ppm = - 75.7 (s, [ <i>pf</i> ] <sup>-</sup> )                                                                                             |

### 1.4. 1-Fe

[Cp<sup>'''</sup>Fe(μ-Br)]<sub>2</sub> (74 mg, 0.1 mmol, 1 eq.), [Cp\*Fe(η<sup>5</sup>-P<sub>5</sub>)] (70 mg, 0.2 mmol, 2 eq.) and Ti[BAR<sup>F</sup>] (277 mg, 0.2 mmol, 2 eq.) were suspended in 4 mL of *o*-DFB to afford a rapid colour change to greenish blue and formation of a colourless solid. The reaction was completed by stirring the solution at room temperature for 2 h and then the solvent was constrained to 2 mL. Afterwards the solution was filtered, the solvent removed, the residue dissolved in 3 mL of CH<sub>2</sub>Cl<sub>2</sub> and layered with 30 mL of *n*-hexane. Storage of this mixture for 7 days yielded dark brownish blue block shaped crystals of [Cp\*Fe(μ;η<sup>5:5</sup>-P<sub>5</sub>)FeCp<sup>'''</sup>][BAR<sup>F</sup>] (**1-Fe**), which were isolated by decanting the solvent and drying under reduced pressure (10<sup>-3</sup> mbar).

|                                                                                 |                                                                                                                                                                                                                                                                  |
|---------------------------------------------------------------------------------|------------------------------------------------------------------------------------------------------------------------------------------------------------------------------------------------------------------------------------------------------------------|
| Yield:                                                                          | 185 mg (0.14 mmol, 70%)                                                                                                                                                                                                                                          |
| Elemental Analysis:                                                             | calculated (%) for [Cp*Fe(μ;η <sup>5:5</sup> -P <sub>5</sub> )FeCp <sup>'''</sup> ][BAR <sup>F</sup> ]: C: 46.61 H: 3.37, found: C: 46.27 H: 3.50                                                                                                                |
| ESI(+)-MS ( <i>o</i> -DFB):                                                     | <i>m/z</i> (%) = 635.1 (100, [ <b>1-Fe</b> ] <sup>+</sup> )                                                                                                                                                                                                      |
| <sup>1</sup> H-NMR (CD <sub>2</sub> Cl <sub>2</sub> , 300 K):                   | δ ppm = 1.10 (s, 15 H, Cp*), 1.19 (s, 9 H, <sup>t</sup> Bu <sub>3</sub> C <sub>5</sub> H <sub>2</sub> ), 1.31 (s, 18 H, <sup>t</sup> Bu <sub>3</sub> C <sub>5</sub> H <sub>2</sub> ), 3.36 (s, 2 H, <sup>t</sup> Bu <sub>3</sub> C <sub>5</sub> H <sub>2</sub> ) |
| <sup>31</sup> P{ <sup>1</sup> H}-NMR (CD <sub>2</sub> Cl <sub>2</sub> , 300 K): | δ ppm = - 12.5 ppm (s, <i>cyclo</i> -P <sub>5</sub> )                                                                                                                                                                                                            |
| <sup>31</sup> P-NMR (CD <sub>2</sub> Cl <sub>2</sub> , 300 K):                  | δ ppm = - 12.5 ppm (s, <i>cyclo</i> -P <sub>5</sub> )                                                                                                                                                                                                            |
| <sup>19</sup> F{ <sup>1</sup> H}-NMR (CD <sub>2</sub> Cl <sub>2</sub> , 300 K): | δ ppm = - 167.4 (br, 8 F, [BAR <sup>F</sup> ] <sup>-</sup> ), - 163.6 (br, 4 F, [BAR <sup>F</sup> ] <sup>-</sup> ), - 132.9 (br, 8 F, [BAR <sup>F</sup> ] <sup>-</sup> )                                                                                         |
| <sup>11</sup> B{ <sup>1</sup> H}-NMR (CD <sub>2</sub> Cl <sub>2</sub> , 300 K): | δ ppm = - 16.8 (s, [BAR <sup>F</sup> ] <sup>-</sup> )                                                                                                                                                                                                            |

### 1.5.1-Co

1-Co has already been prepared on a different route, we reported previously.<sup>11</sup>

[Cp<sup>'''</sup>Co(μ-Cl)]<sub>2</sub> (33 mg, 0.05 mmol, 1 eq.), [Cp<sup>\*</sup>Fe(η<sup>5</sup>-P<sub>5</sub>)] (35 mg, 0.1 mmol, 2 eq.) and Ti[*pf*] (134 mg, 0.1 mmol, 2 eq.) were suspended in 4 mL of *o*-DFB to afford a rapid colour change to dark olive green and formation of a colourless solid. The reaction was completed by stirring the solution at room temperature for 4 h. The solution was filtered and 40 mL of *n*-hexane were added to precipitate [Cp<sup>\*</sup>Fe(μ;η<sup>5:5</sup>-P<sub>5</sub>)CoCp<sup>'''</sup>][*pf*] (**1-Co**) as an olive green powder, which could be isolated in 53% yield (85 mg, 0.085 mmol). Spectroscopic data of this product matches that reported earlier.

### 1.6.1-Ni

[Cp<sup>'''</sup>Ni(μ-Br)]<sub>2</sub> (74 mg, 0.1 mmol, 1 eq.), [Cp<sup>\*</sup>Fe(η<sup>5</sup>-P<sub>5</sub>)] (70 mg, 0.2 mmol, 2 eq.) and K[BAr<sup>F</sup>] (144 mg, 0.2 mmol, 2 eq.) were suspended in 6 mL of *o*-DFB to afford a rapid colour change to brown and formation of a colourless solid. The reaction was completed by stirring the solution at 90 °C for 4 h. Afterwards the solution was filtered, the solvent removed, and the residue washed two times with 15 mL of *n*-hexane, each. The residue was dissolved in 2 mL of *o*-DFB and layered with 10 mL of *n*-hexane. Storage of this mixture at room temperature for 4 days yielded dark brownish block shaped crystals of [Cp<sup>\*</sup>Fe(μ;η<sup>5:5</sup>-P<sub>5</sub>)NiCp<sup>'''</sup>][BAr<sup>F</sup>] (**1-Ni**), which were isolated by decanting the solvent and drying under reduced pressure (10<sup>-3</sup> mbar).

|                                                                                 |                                                                                                                                                                                                                                                                                                                                                             |
|---------------------------------------------------------------------------------|-------------------------------------------------------------------------------------------------------------------------------------------------------------------------------------------------------------------------------------------------------------------------------------------------------------------------------------------------------------|
| Yield:                                                                          | 108 mg (0.1 mmol, 50%)                                                                                                                                                                                                                                                                                                                                      |
| Elemental Analysis:                                                             | calculated (%) for [Cp <sup>*</sup> Fe(μ;η <sup>5:5</sup> -P <sub>5</sub> )NiCp <sup>'''</sup> ][BAr <sup>F</sup> ]:<br>C: 46.50 H: 3.37, found: C: 46.62 H: 3.26                                                                                                                                                                                           |
| ESI(+)-MS ( <i>o</i> -DFB):                                                     | m/z (%) = 637.1 (70, [ <b>1-Ni</b> ] <sup>+</sup> ), 332.2 (100, [ <b>A</b> ] <sup>+</sup> )                                                                                                                                                                                                                                                                |
| <sup>1</sup> H-NMR (CD <sub>2</sub> Cl <sub>2</sub> , 300 K):                   | δ ppm = 15.83 (br, 9 H, <sup>t</sup> Bu <sub>3</sub> C <sub>5</sub> H <sub>2</sub> ), 12.19 (br, 18 H, <sup>b</sup> Bu <sub>3</sub> C <sub>5</sub> H <sub>2</sub> ), 9.21 (br, 15 H, Cp <sup>*</sup> ), signals for the <sup>t</sup> Bu <sub>3</sub> C <sub>5</sub> H <sub>2</sub> could not be found within the <sup>1</sup> H NMR spectrum of <b>1-Ni</b> |
| <sup>31</sup> P{ <sup>1</sup> H}-NMR (CD <sub>2</sub> Cl <sub>2</sub> , 300 K): | δ ppm = no signals observed within +/- 500 ppm                                                                                                                                                                                                                                                                                                              |
| <sup>31</sup> P-NMR (CD <sub>2</sub> Cl <sub>2</sub> , 300 K):                  | δ ppm = no signals observed within +/- 500 ppm                                                                                                                                                                                                                                                                                                              |
| <sup>19</sup> F{ <sup>1</sup> H}-NMR (CD <sub>2</sub> Cl <sub>2</sub> , 300 K): | δ ppm = - 166.3 (br, 8 F, [BAr <sup>F</sup> ] <sup>-</sup> ), - 162.7 (br, 4 F, [BAr <sup>F</sup> ] <sup>-</sup> ), - 132.3 (br, 8 F, [BAr <sup>F</sup> ] <sup>-</sup> )                                                                                                                                                                                    |
| <sup>11</sup> B{ <sup>1</sup> H}-NMR (CD <sub>2</sub> Cl <sub>2</sub> , 300 K): | δ ppm = - 16.8 (s, [BAr <sup>F</sup> ] <sup>-</sup> )                                                                                                                                                                                                                                                                                                       |

### 1.7.2-Fe

[Fe(tol)<sub>2</sub>][pfl]<sub>2</sub> (217 mg, 0.1 mmol, 1 eq.) and [Cp\*Fe(η<sup>5</sup>-P<sub>5</sub>)] (70 mg, 0.2 mmol, 2 eq.) were dissolved in 3 mL of *o*-DFB affording a dark green solution, which was stirred for 10 min. Afterwards the solution was layered with 20 mL of *n*-hexane and stored at 4 °C for three days, yielding dark green plate shaped crystals of [{Cp\*Fe(η<sup>5</sup>-P<sub>5</sub>)<sub>2</sub>Fe][pfl]<sub>2</sub> (**2-Fe**).

As crystal quality of **2-Fe** could not be improved to a level suitable for single crystal X-ray diffractometry, its [BAR<sup>F</sup>]<sup>-</sup> salt was prepared by sonication of [Cp\*Fe(η<sup>5</sup>-P<sub>5</sub>)], K[BAR<sup>F</sup>] and FeBr<sub>2</sub>·dme in *o*-DFB and crystallized from a CH<sub>2</sub>Cl<sub>2</sub>/*n*-hexane layering (3mL/20mL). Notably, the turnover and yield of **2-Fe** in this reaction is drastically decreased compared to the procedure using [Fe(tol)<sub>2</sub>][pfl]<sub>2</sub>. Spectroscopic data for both compounds matches.

|                                                                                 |                                                                                                                                                                                                            |
|---------------------------------------------------------------------------------|------------------------------------------------------------------------------------------------------------------------------------------------------------------------------------------------------------|
| Yield:                                                                          | 240 mg (0.09 mmol, 90%)                                                                                                                                                                                    |
| Elemental Analysis:                                                             | calculated (%) for [{Cp*Fe(η <sup>5</sup> -P <sub>5</sub> ) <sub>2</sub> Fe][pfl] <sub>2</sub> ·(C <sub>6</sub> H <sub>4</sub> F <sub>2</sub> ) <sub>0.7</sub> : C: 24.42 H: 1.20, found: C: 24.46 H: 1.30 |
| ESI(+)-MS ( <i>o</i> -DFB):                                                     | m/z (%) = 373.8 (100, [ <b>2-Fe</b> ] <sup>2+</sup> ), 747.7 (20, [{Cp*Fe(η <sup>5</sup> -P <sub>5</sub> ) <sub>2</sub> Fe] <sup>+</sup> )                                                                 |
| <sup>1</sup> H-NMR (CD <sub>2</sub> Cl <sub>2</sub> , 300 K):                   | δ ppm = 0.70 (s, Cp*)                                                                                                                                                                                      |
| <sup>31</sup> P{ <sup>1</sup> H}-NMR (CD <sub>2</sub> Cl <sub>2</sub> , 300 K): | δ ppm = 12.9 (s, <i>cyclo</i> -P <sub>5</sub> )                                                                                                                                                            |
| <sup>31</sup> P-NMR (CD <sub>2</sub> Cl <sub>2</sub> , 300 K):                  | δ ppm = 12.9 (s, <i>cyclo</i> -P <sub>5</sub> )                                                                                                                                                            |
| <sup>19</sup> F{ <sup>1</sup> H}-NMR (CD <sub>2</sub> Cl <sub>2</sub> , 300 K): | δ ppm = - 75.4 (s, [pfl] <sup>-</sup> )                                                                                                                                                                    |

### 1.8.2-Co

[Co(dfb)<sub>2</sub>][pfl] (125 mg, 0.1 mmol, 1 eq.) dissolved in 2 mL of *o*-DFB was slowly added to [Cp\*Fe(η<sup>5</sup>-P<sub>5</sub>)] (70 mg, 0.2 mmol, 2 eq.) dissolved in 2 mL of *o*-DFB at -30 °C. A rapid colour change to dark green was observed, the solution stirred for 1 h at room temperature and then constrained to 1 mL. 30 mL of *n*-hexane were added to precipitate a dark green powder, which was dried under reduced pressure (10<sup>-3</sup> mbar). 3 mL of *o*-DFB were added, and the solution was layered with 30 mL of *n*-hexane. Storage at room temperature for two days yielded dark green plate shaped crystals of [{Cp\*Fe(η<sup>5</sup>-P<sub>5</sub>)<sub>2</sub>Co][pfl] (**2-Co**).

|                                                                                              |                                                                                                                                                                              |
|----------------------------------------------------------------------------------------------|------------------------------------------------------------------------------------------------------------------------------------------------------------------------------|
| Yield:                                                                                       | 154 mg (0.09 mmol, 90%)                                                                                                                                                      |
| Elemental Analysis:                                                                          | calculated (%) for [{Cp*Fe(η <sup>5</sup> -P <sub>5</sub> ) <sub>2</sub> Co][pfl]·(C <sub>6</sub> H <sub>4</sub> F <sub>2</sub> ): C: 27.54 H: 1.87, found: C: 27.59 H: 1.98 |
| ESI(+)-MS ( <i>o</i> -DFB):                                                                  | m/z (%) = 750.8 (100, [ <b>2-Co</b> ] <sup>+</sup> )                                                                                                                         |
| <sup>1</sup> H-NMR ( <i>o</i> -DFB/C <sub>6</sub> D <sub>6</sub> , 300 K):                   | δ ppm = 11.81 (br, Cp*)                                                                                                                                                      |
| <sup>31</sup> P{ <sup>1</sup> H}-NMR ( <i>o</i> -DFB/C <sub>6</sub> D <sub>6</sub> , 300 K): | δ ppm = no signals observed within +/- 500 ppm                                                                                                                               |
| <sup>31</sup> P-NMR ( <i>o</i> -DFB/C <sub>6</sub> D <sub>6</sub> , 300 K):                  | δ ppm = no signals observed within +/- 500 ppm                                                                                                                               |
| <sup>19</sup> F{ <sup>1</sup> H}-NMR ( <i>o</i> -DFB/C <sub>6</sub> D <sub>6</sub> , 300 K): | δ ppm = - 74.1 (s, [pfl] <sup>-</sup> )                                                                                                                                      |

### 1.9.3

[Fe(tol)<sub>2</sub>][pf]<sub>2</sub> (24 mg, 0.01 mmol, 1 eq.) and [Cp\*Fe(η<sup>5</sup>-As<sub>5</sub>)] (11 mg, 0.02 mmol, 2 eq.) were dissolved in 3 mL of *o*-DFB affording a dark brown solution, which was stirred for 2 h. Afterwards the solution was layered with 50 mL of *n*-hexane and stored at room temperature for three days, yielding dark brownish green plate shaped crystals of [{Cp\*Fe(η<sup>5</sup>-As<sub>5</sub>)<sub>2</sub>Fe][TEF]<sub>2</sub> (**3**).

|                                                                                              |                                                                                                                                                                                                  |
|----------------------------------------------------------------------------------------------|--------------------------------------------------------------------------------------------------------------------------------------------------------------------------------------------------|
| Yield:                                                                                       | 30 mg (0.0096 mmol, 96%)                                                                                                                                                                         |
| Elemental Analysis:                                                                          | calculated (%) for<br>[{Cp*Fe(η <sup>5</sup> -As <sub>5</sub> ) <sub>2</sub> Fe][pf] <sub>2</sub> ·(C <sub>6</sub> H <sub>4</sub> F <sub>2</sub> ): C: 21.51 H:<br>1.06, found: C: 21.30 H: 1.24 |
| ESI(+)-MS ( <i>o</i> -DFB):                                                                  | m/z (%) = 593.6 (100, [ <b>2-Fe</b> ] <sup>2+</sup> ), 1187.2 (20,<br>[{Cp*Fe(η <sup>5</sup> -As <sub>5</sub> ) <sub>2</sub> Fe] <sup>+</sup> )                                                  |
| <sup>1</sup> H-NMR ( <i>o</i> -DFB/C <sub>6</sub> D <sub>6</sub> , 300 K):                   | δ ppm = 0.36 (s, Cp*)                                                                                                                                                                            |
| <sup>19</sup> F{ <sup>1</sup> H}-NMR ( <i>o</i> -DFB/C <sub>6</sub> D <sub>6</sub> , 300 K): | δ ppm = - 75.4 (s, [pf] <sup>-</sup> )                                                                                                                                                           |

### 1.10. [Fe(tol)<sub>2</sub>][pf]<sub>2</sub>

Fe(CO)<sub>5</sub> in 1.3 mL of toluene (1.96 mmol, 384 mg, 1 eq.) was added to a purple suspension of [Ag(CH<sub>2</sub>Cl<sub>2</sub>)<sub>2</sub>][pf] (3.92 mmol, 4.88 g, 2 eq.) and I<sub>2</sub> (497 mg, 1.96 mmol, 1 eq.) in 20 mL of *o*-DFB, which resulted in a rapid colour change to dark red and precipitation of colourless solid. Stirring at 90 °C for 16 hours completed the reaction, after which an orange solution with colourless precipitate was obtained. Filtration and precipitation with *n*-hexane afforded [Fe(tol)<sub>2</sub>][pf]<sub>2</sub> as analytically pure compound. Crystals suitable for X-ray diffraction studies could be obtained by layering a concentrated solution in *o*-DFB with *n*-hexane and storage at room temperature for two days.

|                                                                                              |                                                                                                                |
|----------------------------------------------------------------------------------------------|----------------------------------------------------------------------------------------------------------------|
| Yield:                                                                                       | 3.45 g (1.6 mmol, 82%)                                                                                         |
| Elemental Analysis:                                                                          | calculated (%) for [Fe(tol) <sub>2</sub> ][pf] <sub>2</sub> : C: 25.39 H: 0.76,<br>found: C: 25.77 H: 0.93     |
| ESI(+)-MS ( <i>o</i> -DFB):                                                                  | m/z (%) = 239.0 (10, [Fe(tol) <sub>2</sub> ]-H <sup>+</sup> ), 240.1 (10,<br>[ <b>Fe(tol)</b> ] <sup>+</sup> ) |
| <sup>1</sup> H-NMR ( <i>o</i> -DFB/C <sub>6</sub> D <sub>6</sub> , 300 K):                   | δ ppm = 7.49 (m, 3 H, <u>Ph</u> Me), 7.41 (m, 2 H,<br><u>Ph</u> Me), 3.21 (s, 3 H, <u>Ph</u> Me)               |
| <sup>19</sup> F{ <sup>1</sup> H}-NMR ( <i>o</i> -DFB/C <sub>6</sub> D <sub>6</sub> , 300 K): | δ ppm = -75.5 (s, [pf] <sup>-</sup> )                                                                          |

## 2. Crystallographic Data

### 2.1. General Consideration

The crystallographic data for all described compounds were collected on a GV50 diffractometer (Rigaku) with a Titan<sup>S2</sup> detector using Cu–K $\alpha$  radiation (**1-Cr**, **1-Mn**, **1-Ni**, **2-Co**) or an XtaLAB Synergy R, DW System with a HyPix-Arc 150 detector using Cu–K $\alpha$  radiation from a rotating anode (**1-Fe**, **2-Fe**[BAR<sup>F</sup>], **3**). Data reduction and absorption correction were performed with the CrysAlisPro software package.<sup>[12]</sup> Structure solution and refinement was conducted in Olex2 (1.5-alpha)<sup>[13]</sup> with ShelXT<sup>[14]</sup> (solution) and ShelXL-2018/3<sup>[15]</sup> (least squares refinement ( $F^2$ )). All non-H atoms were refined with anisotropic displacement parameters and H atoms were treated as riding models with isotropic displacement parameters and fixed C–H bond lengths (sp<sup>3</sup>: 0.96 (CH<sub>3</sub>), 0.97 (CH<sub>2</sub>); sp<sup>2</sup>: 0.93 (CH)). Visualisation of the crystal structures was performed with Olex2 (1.5-alpha).<sup>[13]</sup>

CIF files with comprehensive information on the details of the diffraction experiments and full tables of bond lengths and angles for **1-Cr**, **1-Mn**, **1-Fe**, **1-Ni**, **2-Fe**, **2-Co**, **3** and **[Fe(tol)<sub>2</sub>][pf]<sub>2</sub>** are deposited in Cambridge Crystallographic Data Centre under the deposition codes CCDC 2242844-2242851.

Table S 1: Crystallographic and refinement data for compounds **1-Cr** – **1-Ni**, **2-Fe**, **2-Co** and **3**.

| Compound                                    | <b>1-Cr</b>                                                         | <b>1-Mn</b>                                                                         | <b>1-Fe</b>                                                                         | <b>1-Ni</b>                                                                                                     |
|---------------------------------------------|---------------------------------------------------------------------|-------------------------------------------------------------------------------------|-------------------------------------------------------------------------------------|-----------------------------------------------------------------------------------------------------------------|
| CCDC                                        | 2242844                                                             | 2242845                                                                             | 2242846                                                                             | 2242847                                                                                                         |
| Empirical formula                           | C <sub>54</sub> H <sub>46</sub> BCrF <sub>21</sub> FeP <sub>5</sub> | C <sub>43</sub> H <sub>44</sub> AlF <sub>36</sub> FeMnO <sub>4</sub> P <sub>5</sub> | C <sub>51.5</sub> H <sub>45</sub> BClF <sub>20</sub> Fe <sub>2</sub> P <sub>5</sub> | C <sub>102</sub> H <sub>88</sub> B <sub>2</sub> F <sub>40</sub> Fe <sub>2</sub> Ni <sub>2</sub> P <sub>10</sub> |
| Formula weight                              | 1367.42                                                             | 1601.40                                                                             | 1356.68                                                                             | 2634.16                                                                                                         |
| Temperature/K                               | 122.99(10)                                                          | 123.00(10)                                                                          | 123.00(10)                                                                          | 122.99(10)                                                                                                      |
| Crystal system                              | monoclinic                                                          | monoclinic                                                                          | monoclinic                                                                          | monoclinic                                                                                                      |
| Space group                                 | <i>P2<sub>1</sub>/c</i>                                             | <i>P2<sub>1</sub>/c</i>                                                             | <i>P2<sub>1</sub>/c</i>                                                             | <i>P2<sub>1</sub></i>                                                                                           |
| a/Å                                         | 15.7984(2)                                                          | 11.95740(10)                                                                        | 15.6478(3)                                                                          | 15.8271(2)                                                                                                      |
| b/Å                                         | 19.8256(2)                                                          | 21.6035(2)                                                                          | 19.8608(3)                                                                          | 19.95370(10)                                                                                                    |
| c/Å                                         | 18.1573(2)                                                          | 23.2630(2)                                                                          | 18.1588(2)                                                                          | 17.9342(2)                                                                                                      |
| $\alpha$ /°                                 | 90                                                                  | 90                                                                                  | 90                                                                                  | 90                                                                                                              |
| $\beta$ /°                                  | 104.2570(10)                                                        | 93.7580(10)                                                                         | 104.7420(10)                                                                        | 105.1610(10)                                                                                                    |
| $\gamma$ /°                                 | 90                                                                  | 90                                                                                  | 90                                                                                  | 90                                                                                                              |
| Volume/Å <sup>3</sup>                       | 5511.94(11)                                                         | 5996.42(9)                                                                          | 5457.58(15)                                                                         | 5466.65(10)                                                                                                     |
| Z                                           | 4                                                                   | 4                                                                                   | 4                                                                                   | 2                                                                                                               |
| $\rho$ calc/cm <sup>3</sup>                 | 1.648                                                               | 1.774                                                                               | 1.651                                                                               | 1.600                                                                                                           |
| $\mu$ /mm <sup>-1</sup>                     | 6.102                                                               | 6.488                                                                               | 7.058                                                                               | 4.886                                                                                                           |
| F(000)                                      | 2756.0                                                              | 3188.0                                                                              | 2732.0                                                                              | 2656.0                                                                                                          |
| Crystal size/mm <sup>3</sup>                | 0.38 × 0.22 × 0.04                                                  | 0.259 × 0.2 × 0.163                                                                 | 0.29 × 0.23 × 0.06                                                                  | 0.293 × 0.248 × 0.219                                                                                           |
| Radiation                                   | Cu K $\alpha$ ( $\lambda$ = 1.54184)                                | Cu K $\alpha$ ( $\lambda$ = 1.54184)                                                | Cu K $\alpha$ ( $\lambda$ = 1.54184)                                                | Cu K $\alpha$ ( $\lambda$ = 1.54184)                                                                            |
| 2 $\theta$ range for data collection/°      | 7.294 to 133.46                                                     | 7.41 to 133.506                                                                     | 5.84 to 144.244                                                                     | 7.288 to 133.626                                                                                                |
| Index ranges                                | -18 ≤ h ≤ 18, -23 ≤ k ≤ 23, -20 ≤ l ≤ 21                            | -13 ≤ h ≤ 14, -25 ≤ k ≤ 25, -27 ≤ l ≤ 27                                            | -19 ≤ h ≤ 17, -24 ≤ k ≤ 23, -21 ≤ l ≤ 22                                            | -18 ≤ h ≤ 18, -20 ≤ k ≤ 23, -21 ≤ l ≤ 20                                                                        |
| Reflections collected                       | 57435                                                               | 63995                                                                               | 52174                                                                               | 52429                                                                                                           |
| Independent reflections                     | 9708 [Rint = 0.0577, Rsigma = 0.0324]                               | 10585 [Rint = 0.0488, Rsigma = 0.0256]                                              | 10344 [Rint = 0.0479, Rsigma = 0.0331]                                              | 15560 [Rint = 0.0533, Rsigma = 0.0411]                                                                          |
| Data/restraints/parameters                  | 9708/200/906                                                        | 10585/1041/1179                                                                     | 10344/18/803                                                                        | 15560/0/1449                                                                                                    |
| Goodness-of-fit on F <sup>2</sup>           | 1.046                                                               | 1.019                                                                               | 1.099                                                                               | 1.018                                                                                                           |
| Final R indexes [ $I \geq 2\sigma(I)$ ]     | R1 = 0.0384, wR2 = 0.1067                                           | R1 = 0.0370, wR2 = 0.0943                                                           | R1 = 0.0446, wR2 = 0.1226                                                           | R1 = 0.0363, wR2 = 0.0914                                                                                       |
| Final R indexes [all data]                  | R1 = 0.0427, wR2 = 0.1114                                           | R1 = 0.0389, wR2 = 0.0961                                                           | R1 = 0.0541, wR2 = 0.1286                                                           | R1 = 0.0377, wR2 = 0.0928                                                                                       |
| Largest diff. peak/hole / e Å <sup>-3</sup> | 0.45/-0.62                                                          | 0.71/-0.37                                                                          | 0.67/-0.72                                                                          | 0.57/-0.44                                                                                                      |
| Flack parameter                             | /                                                                   | /                                                                                   | /                                                                                   | 0.488(5)                                                                                                        |



| Compound                                    | 2-Fe                                                                                                           | 2-Co                                                                                               | 3                                                                                                               | [Fe(tol) <sub>2</sub> ][pf] <sub>2</sub>                                                         |
|---------------------------------------------|----------------------------------------------------------------------------------------------------------------|----------------------------------------------------------------------------------------------------|-----------------------------------------------------------------------------------------------------------------|--------------------------------------------------------------------------------------------------|
| CCDC                                        | 2242848                                                                                                        | 2242849                                                                                            | 2242850                                                                                                         | 2242851                                                                                          |
| Empirical formula                           | C <sub>69</sub> H <sub>32</sub> B <sub>2</sub> Cl <sub>2</sub> F <sub>40</sub> Fe <sub>3</sub> P <sub>10</sub> | C <sub>39</sub> H <sub>32</sub> AlCoF <sub>37</sub> Fe <sub>2</sub> O <sub>4</sub> P <sub>10</sub> | C <sub>70</sub> H <sub>42</sub> Al <sub>2</sub> As <sub>10</sub> F <sub>78</sub> Fe <sub>3</sub> O <sub>8</sub> | C <sub>92</sub> H <sub>32</sub> Al <sub>4</sub> F <sub>144</sub> Fe <sub>2</sub> O <sub>16</sub> |
| Formula weight                              | 2190.71                                                                                                        | 1774.95                                                                                            | 3463.74                                                                                                         | 4348.79                                                                                          |
| Temperature/K                               | 123.02(10)                                                                                                     | 123.00(10)                                                                                         | 123.01(10)                                                                                                      | 123.00(10)                                                                                       |
| Crystal system                              | monoclinic                                                                                                     | monoclinic                                                                                         | monoclinic                                                                                                      | triclinic                                                                                        |
| Space group                                 | <i>P</i> 2 <sub>1</sub> / <i>c</i>                                                                             | <i>P</i> 2 <sub>1</sub> / <i>c</i>                                                                 | <i>P</i> 2 <sub>1</sub> / <i>c</i>                                                                              | <i>P</i> $\bar{1}$                                                                               |
| a/Å                                         | 19.4743(2)                                                                                                     | 10.87740(10)                                                                                       | 33.7409(2)                                                                                                      | 15.9325(4)                                                                                       |
| b/Å                                         | 20.2790(2)                                                                                                     | 28.6587(3)                                                                                         | 14.01600(10)                                                                                                    | 16.1088(4)                                                                                       |
| c/Å                                         | 20.0413(2)                                                                                                     | 20.0246(2)                                                                                         | 22.6687(2)                                                                                                      | 26.3304(6)                                                                                       |
| α/°                                         | 90                                                                                                             | 90                                                                                                 | 90                                                                                                              | 92.872(2)                                                                                        |
| β/°                                         | 91.7850(10)                                                                                                    | 96.7550(10)                                                                                        | 102.8080(10)                                                                                                    | 91.023(2)                                                                                        |
| γ/°                                         | 90                                                                                                             | 90                                                                                                 | 90                                                                                                              | 94.758(2)                                                                                        |
| Volume/Å <sup>3</sup>                       | 7910.86(14)                                                                                                    | 6198.98(11)                                                                                        | 10453.57(14)                                                                                                    | 6724.4(3)                                                                                        |
| Z                                           | 4                                                                                                              | 4                                                                                                  | 4                                                                                                               | 2                                                                                                |
| ρ <sub>calc</sub> /cm <sup>3</sup>          | 1.839                                                                                                          | 1.902                                                                                              | 2.201                                                                                                           | 2.148                                                                                            |
| μ/mm <sup>-1</sup>                          | 8.166                                                                                                          | 9.782                                                                                              | 8.760                                                                                                           | 4.454                                                                                            |
| F(000)                                      | 4312.0                                                                                                         | 3492.0                                                                                             | 6648.0                                                                                                          | 4224.0                                                                                           |
| Crystal size/mm <sup>3</sup>                | 0.22 × 0.14 × 0.03                                                                                             | 0.29 × 0.23 × 0.09                                                                                 | 0.19 × 0.17 × 0.07                                                                                              | 0.251 × 0.166 × 0.112                                                                            |
| Radiation                                   | Cu Kα (λ = 1.54184)                                                                                            | Cu Kα (λ = 1.54184)                                                                                | Cu Kα (λ = 1.54184)                                                                                             | Cu Kα (λ = 1.54184)                                                                              |
| 2θ range for data collection/°              | 6.202 to 150.304                                                                                               | 7.604 to 133.968                                                                                   | 5.372 to 143.816                                                                                                | 7.502 to 134.246                                                                                 |
| Index ranges                                | -23 ≤ h ≤ 24, -24 ≤ k ≤ 17, -24 ≤ l ≤ 24                                                                       | -12 ≤ h ≤ 12, -34 ≤ k ≤ 33, -18 ≤ l ≤ 23                                                           | -39 ≤ h ≤ 41, -17 ≤ k ≤ 15, -26 ≤ l ≤ 27                                                                        | -18 ≤ h ≤ 18, -19 ≤ k ≤ 19, -31 ≤ l ≤ 31                                                         |
| Reflections collected                       | 85089                                                                                                          | 66406                                                                                              | 103420                                                                                                          | 42141                                                                                            |
| Independent reflections                     | 15714 [R <sub>int</sub> = 0.0379, R <sub>sigma</sub> = 0.0302]                                                 | 10977 [R <sub>int</sub> = 0.0698, R <sub>sigma</sub> = 0.0392]                                     | 20045 [R <sub>int</sub> = 0.0521, R <sub>sigma</sub> = 0.0336]                                                  | 42141 [R <sub>int</sub> = ?, R <sub>sigma</sub> = 0.0374]                                        |
| Data/restraints/parameters                  | 15714/280/1236                                                                                                 | 10977/1392/1244                                                                                    | 20045/1584/2363                                                                                                 | 42141/2636/2870                                                                                  |
| Goodness-of-fit on F <sup>2</sup>           | 1.044                                                                                                          | 1.028                                                                                              | 1.069                                                                                                           | 0.997                                                                                            |
| Final R indexes [I >= 2σ (I)]               | R1 = 0.0543, wR2 = 0.1477                                                                                      | R1 = 0.0470, wR2 = 0.1154                                                                          | R1 = 0.0411, wR2 = 0.1087                                                                                       | R1 = 0.0579, wR2 = 0.1540                                                                        |
| Final R indexes [all data]                  | R1 = 0.0708, wR2 = 0.1582                                                                                      | R1 = 0.0570, wR2 = 0.1235                                                                          | R1 = 0.0534, wR2 = 0.1155                                                                                       | R1 = 0.0795, wR2 = 0.1642                                                                        |
| Largest diff. peak/hole / e Å <sup>-3</sup> | 0.91/-0.92                                                                                                     | 0.93/-0.70                                                                                         | 0.99/-0.58                                                                                                      | 1.52/-0.68                                                                                       |
| Flack parameter                             | /                                                                                                              | /                                                                                                  | /                                                                                                               | /                                                                                                |

### 2.2. 1-Cr

Compound **1-Cr** crystallizes in the monoclinic space group  $P2_1/c$  forming dark red plates from *o*-DFB/*n*-hexane mixtures at room temperature. The asymmetric unit contains the cation, one anion and one *o*-DFB molecule. All non-hydrogen atoms were refined anisotropically and the H atoms were treated as riding models.

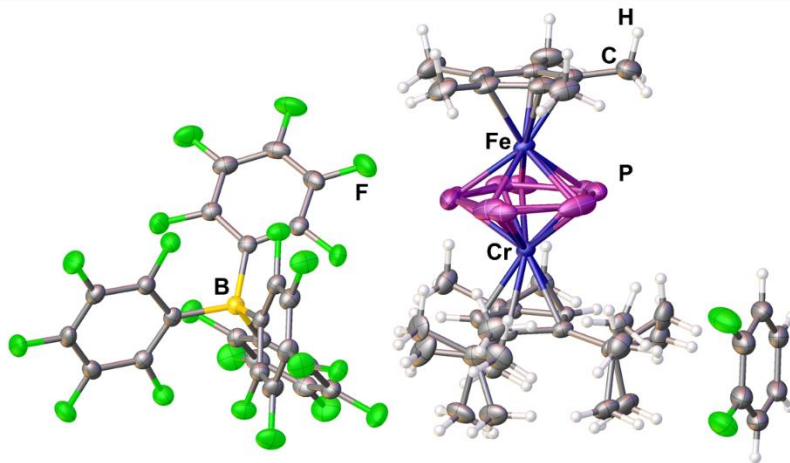

Figure S 1: Solid state structure of **1-Cr**; Shown is the asymmetric unit containing one cation, one anion as well as one *o*-DFB molecule; thermal ellipsoids are drawn at the 50% probability level.

### 2.3. 1-Mn

Compound **1-Mn** crystallizes in the monoclinic space group  $P2_1/c$  forming dark green blocks from  $\text{CH}_2\text{Cl}_2$ /*n*-hexane mixtures at room temperature. The asymmetric unit contains the cation and one anion. All non-hydrogen atoms were refined anisotropically and the H atoms were treated as riding models. Disorder within the anion was treated with appropriate restraints.

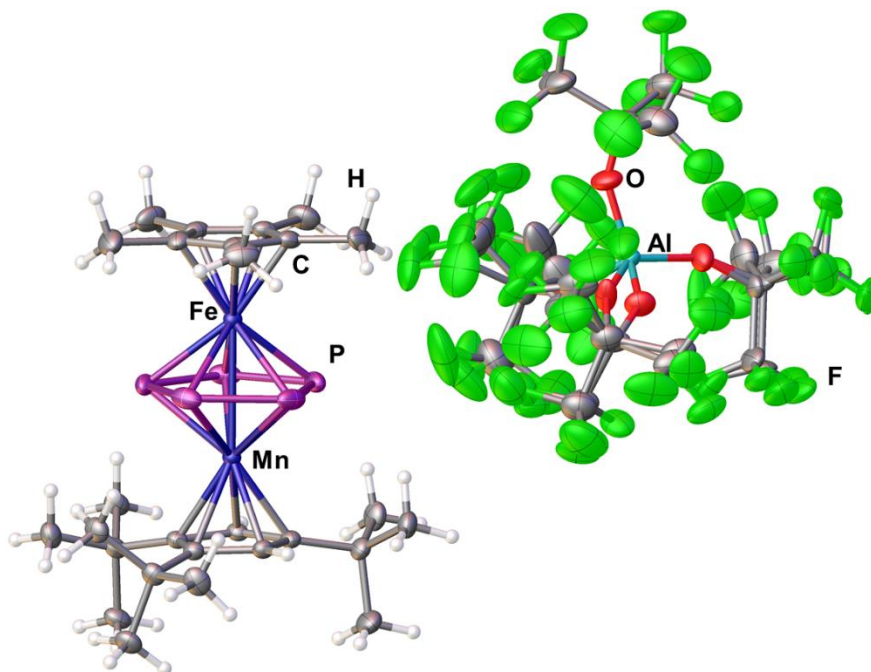

Figure S 2: Solid state structure of **1-Mn**; Shown is the asymmetric unit containing one cation and one anion; thermal ellipsoids are drawn at the 50% probability level.

### 2.4. 1-Fe

Compound **1-Fe** crystallizes in the monoclinic space group  $P2_1/c$  forming dark brownish-blue blocks from  $\text{CH}_2\text{Cl}_2/n$ -hexane mixtures at room temperature. The asymmetric unit contains the cation and one anion. All non-hydrogen atoms were refined anisotropically and the H atoms were treated as riding models. Disorder within on <sup>t</sup>Bu group was treated with appropriate restraints.

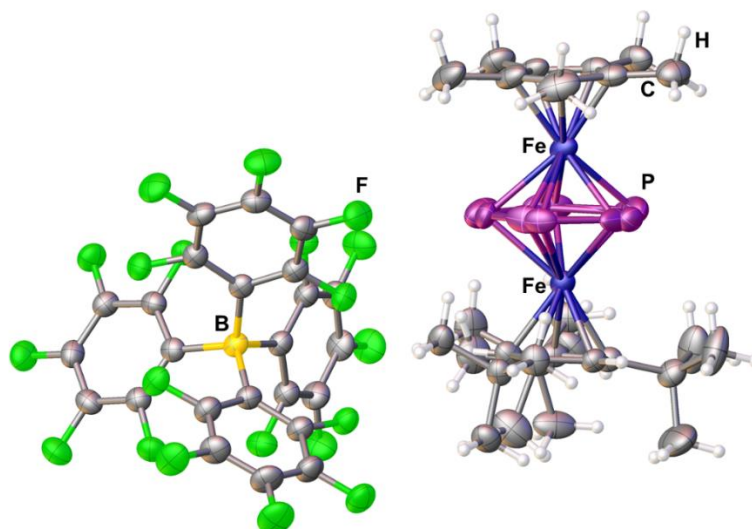

Figure S 3: Solid state structure of **1-Fe**; Shown is the asymmetric unit containing one cation and one anion; thermal ellipsoids are drawn at the 50% probability level.

### 2.5. 1-Ni

Compound **1-Ni** crystallizes in the monoclinic space group  $P2_1$  forming dark brown blocks from *o*-DFB/*n*-hexane mixtures at room temperature. The asymmetric unit contains two distinct cations and two anions. All non-hydrogen atoms were refined anisotropically and the H atoms were treated as riding models.

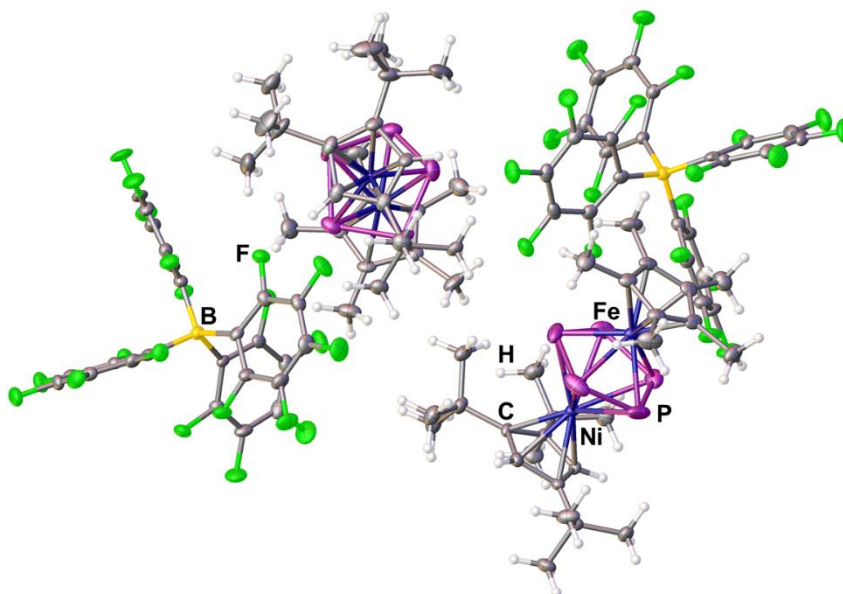

Figure S 4: Solid state structure of **1-Ni**; Shown is the asymmetric unit containing two distinct cations and two anions; thermal ellipsoids are drawn at the 50% probability level.

## 2.6. 2-Fe

Compound **2-Fe** crystallizes in the monoclinic space group  $P2_1/c$  forming dark green plates from  $\text{CH}_2\text{Cl}_2/n$ -hexane mixtures at room temperature. The asymmetric unit contains one cation and two anions, as well as 0.9  $\text{CH}_2\text{Cl}_2$  molecules. All non-hydrogen atoms were refined anisotropically and the H atoms were treated as riding models. Disorder within the *cyclo*- $\text{P}_5$  ligands was treated with appropriate restraints.

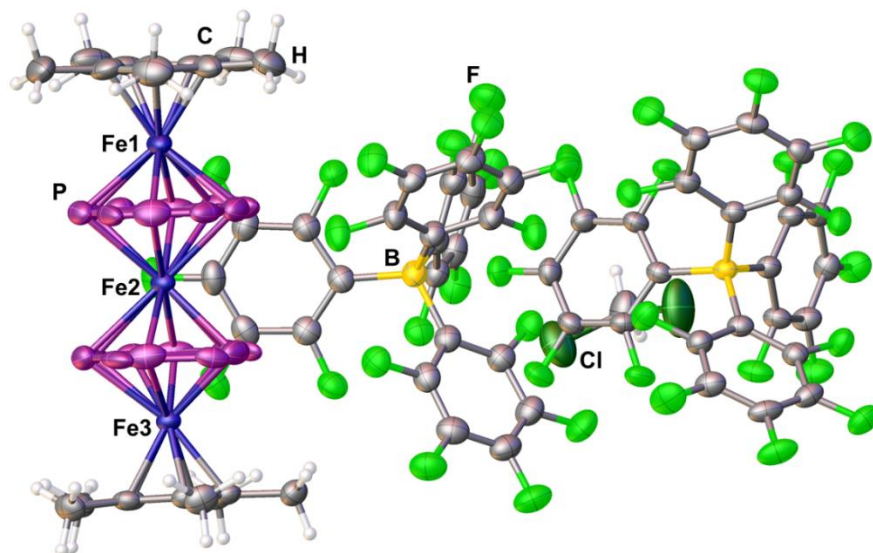

Figure S 5: Solid state structure of **2-Fe**; Shown is the asymmetric unit containing one dication, two anions as well as one  $\text{CH}_2\text{Cl}_2$  molecule; thermal ellipsoids are drawn at the 50% probability level.

## 2.7. 2-Co

Compound **2-Co** crystallizes in the monoclinic space group  $P2_1/c$  forming dark green plates from *o*-DFB/*n*-hexane mixtures at room temperature. The asymmetric unit contains one cation and one anion and an *o*-DFB molecule. All non-hydrogen atoms were refined anisotropically and the H atoms were treated as riding models. Disorder within the anion was treated with appropriate restraints.

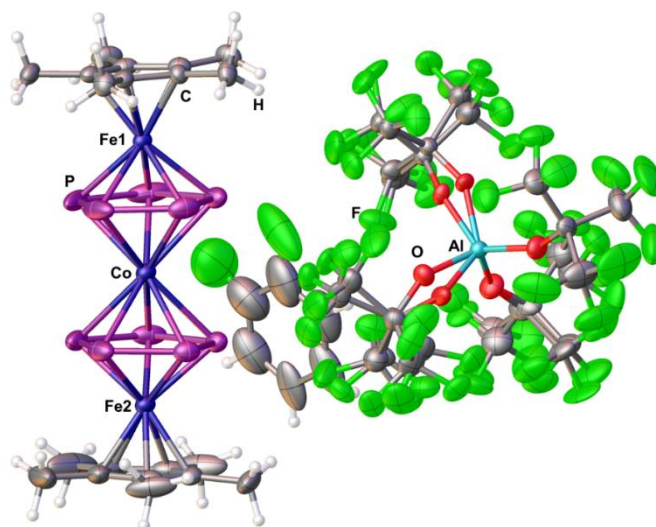

Figure S 6: Solid state structure of **2-Co**; Shown is the asymmetric unit containing one cation, one anion as well as one *o*-DFB molecule; thermal ellipsoids are drawn at the 50% probability level.

### 2.8.3

Compound **3** crystallizes in the monoclinic space group  $P2_1/c$  forming dark brownish green plates from *o*-DFB/*n*-hexane mixtures at room temperature. The asymmetric unit contains one cation, two anions and three *o*-DFB molecules. All non-hydrogen atoms were refined anisotropically and the H atoms were treated as riding models. Disorder within the anions and solvent molecules was treated with appropriate restraints.

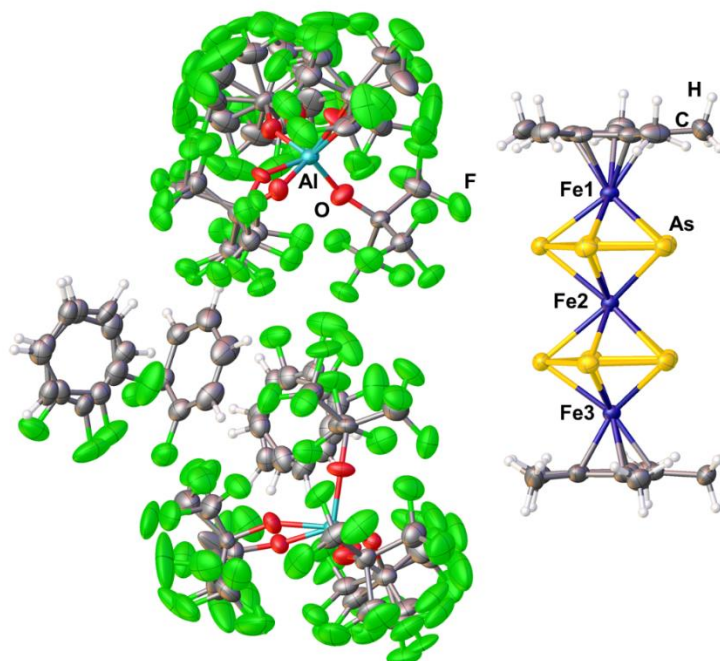

Figure S 7: Solid state structure of **3**; Shown is the asymmetric unit containing one dication, two anions as well as three *o*-DFB molecules; thermal ellipsoids are drawn at the 50% probability level.

### 2.9. $[\text{Fe}(\text{tol})_2][\text{pf}]_2$

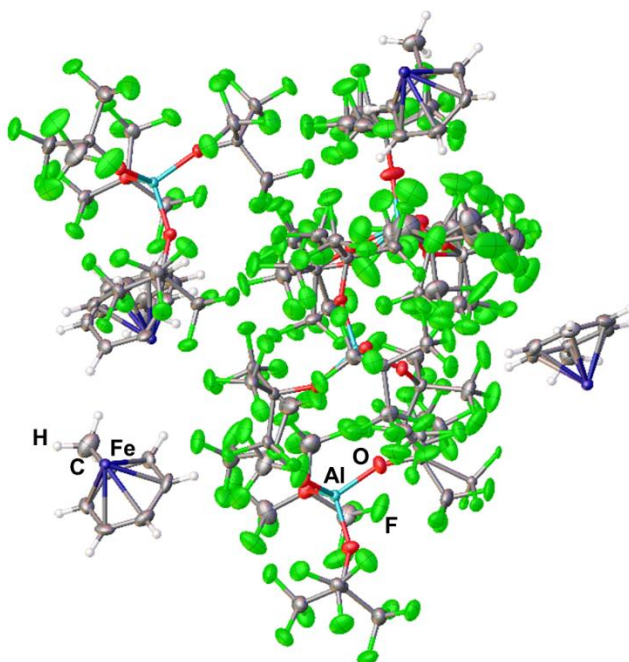

Figure S 8: Solid state structure of  $[\text{Fe}(\text{tol})_2][\text{pf}]_2$ ; Shown is the asymmetric unit containing four half dications and four anions; thermal ellipsoids are drawn at the 50% probability level.

### 3. Spectroscopic Data

#### 3.1. 1-Cr

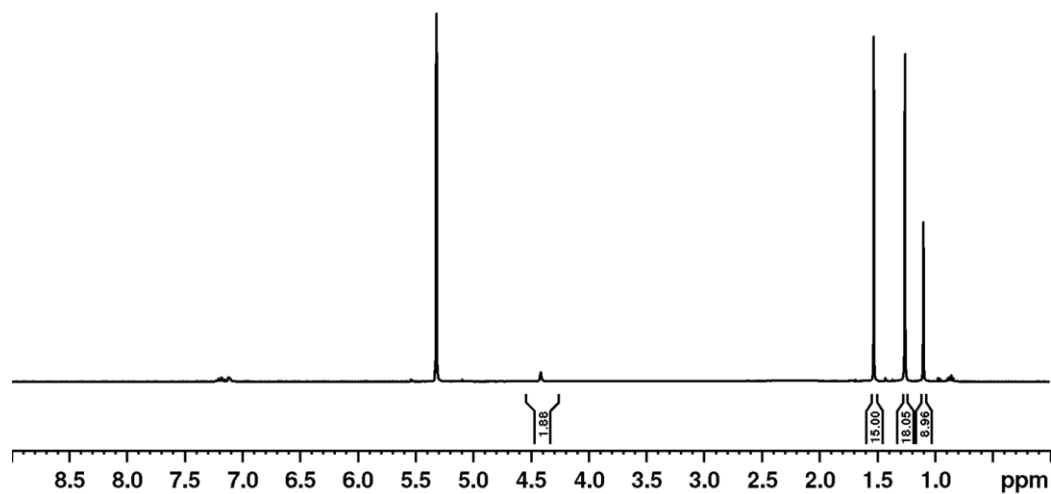

Figure S 9:  $^1\text{H}$  NMR spectrum of **1-Cr** in  $\text{CD}_2\text{Cl}_2$  recorded at room temperature.

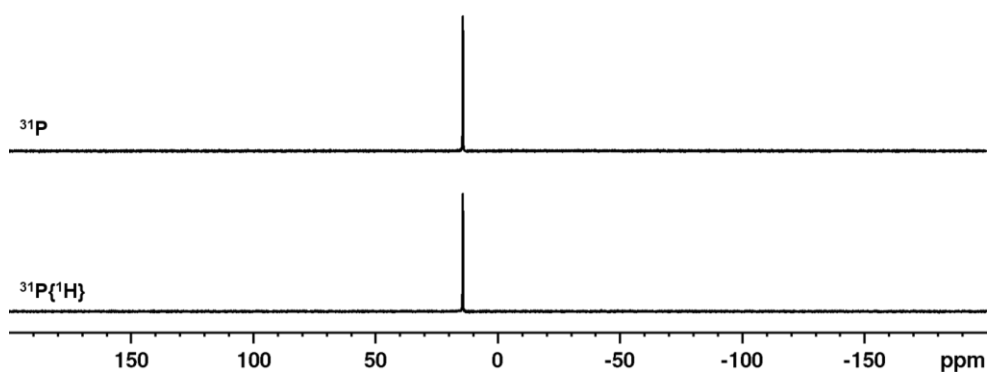

Figure S 10:  $^{31}\text{P}$  (top) and  $^{31}\text{P}\{^1\text{H}\}$  (bottom) NMR spectrum of **1-Cr** in  $\text{CD}_2\text{Cl}_2$  recorded at room temperature.

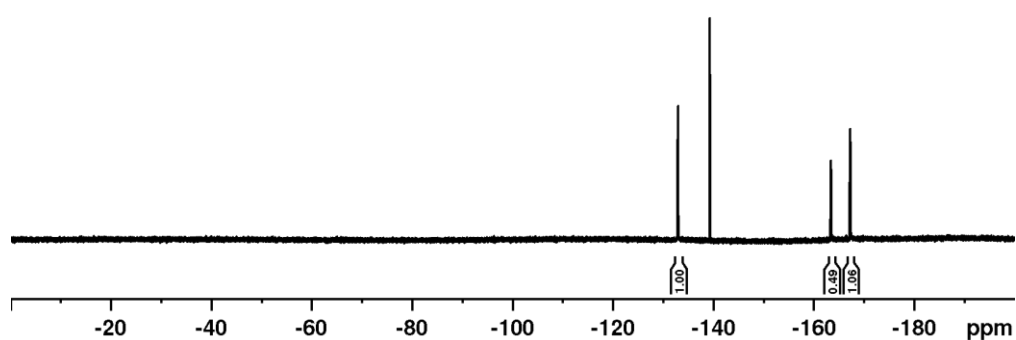

Figure S 11:  $^{19}\text{F}\{^1\text{H}\}$  NMR spectrum of **1-Cr** in  $\text{CD}_2\text{Cl}_2$  recorded at room temperature.

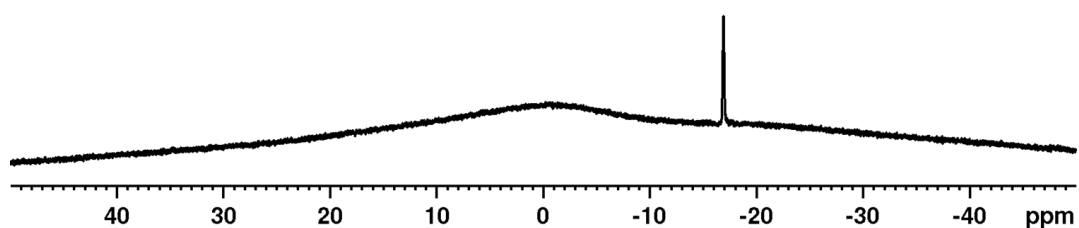

Figure S 12:  $^{11}\text{B}\{^1\text{H}\}$  NMR spectrum of **1-Cr** in  $\text{CD}_2\text{Cl}_2$  recorded at room temperature.



### 3.2. 1-Mn

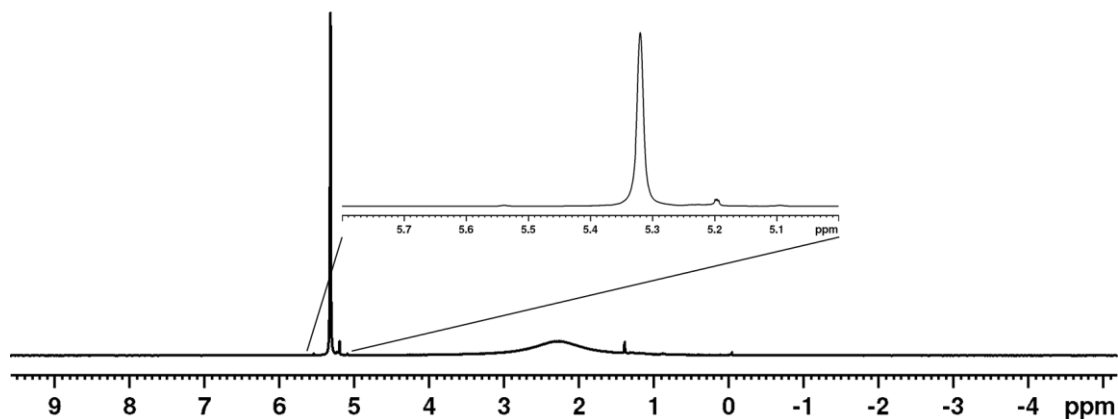

Figure S 13:  $^1\text{H}$  NMR spectrum of **1-Mn** in  $\text{CD}_2\text{Cl}_2$  recorded at room temperature; 32 mg of substance were dissolved in 0.6 mL of  $\text{CD}_2\text{Cl}_2$  inside the NMR tube and a coaxial capillary filled with  $\text{CD}_2\text{Cl}_2$  was added to determine the number of unpaired electrons in **1-Mn** via the Evans method.

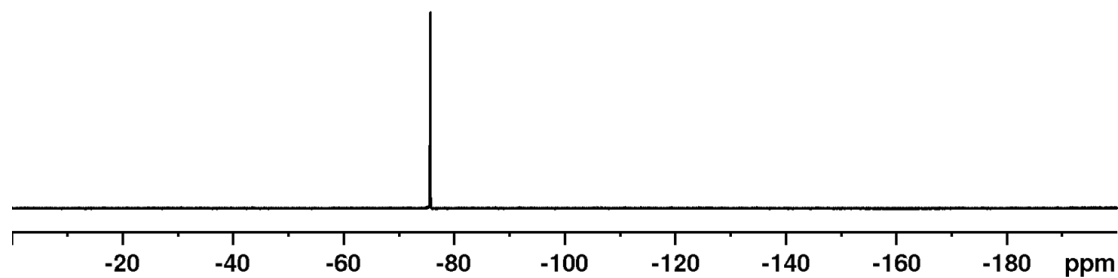

Figure S 14:  $^{19}\text{F}\{^1\text{H}\}$  NMR spectrum of **1-Mn** in  $\text{CD}_2\text{Cl}_2$  recorded at room temperature.

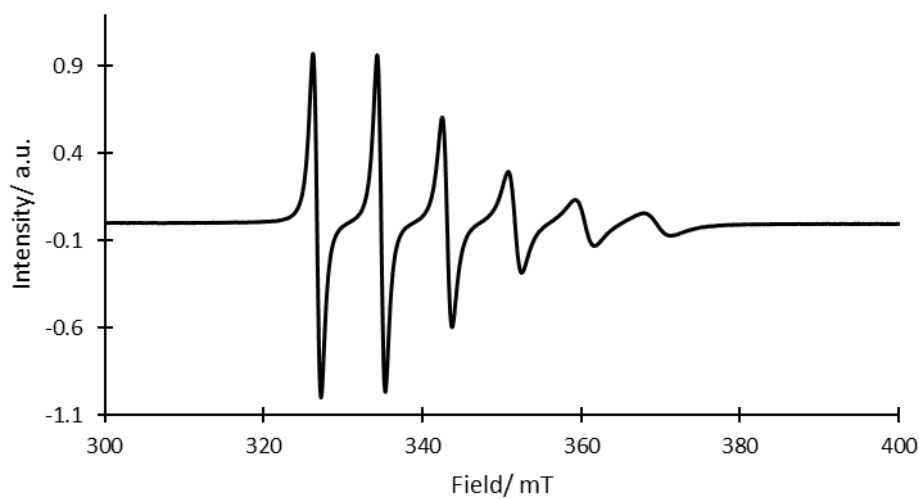

Figure S 15: X-band EPR spectrum of **1-Mn** in *o*-DFB recorded at room temperature.

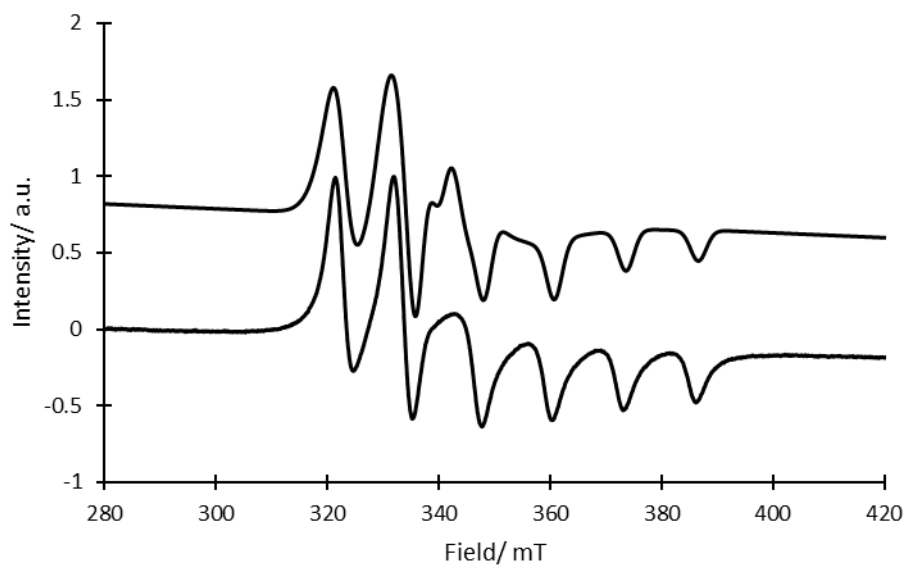

Figure S 16: Experimental (bottom) and simulated (top) X-band EPR spectrum of **1-Mn** in frozen *o*-DFB solution recorded at 77 K; Simulation:  $g_{\parallel} = 1.977$ ,  $g_{\perp} = 1.903$ ,  $A_{\parallel} = 125.26$  MHz,  $A_{\perp} = 337.72$  MHz,  $lw = 3.2$  mT.

### 3.3.1-Fe

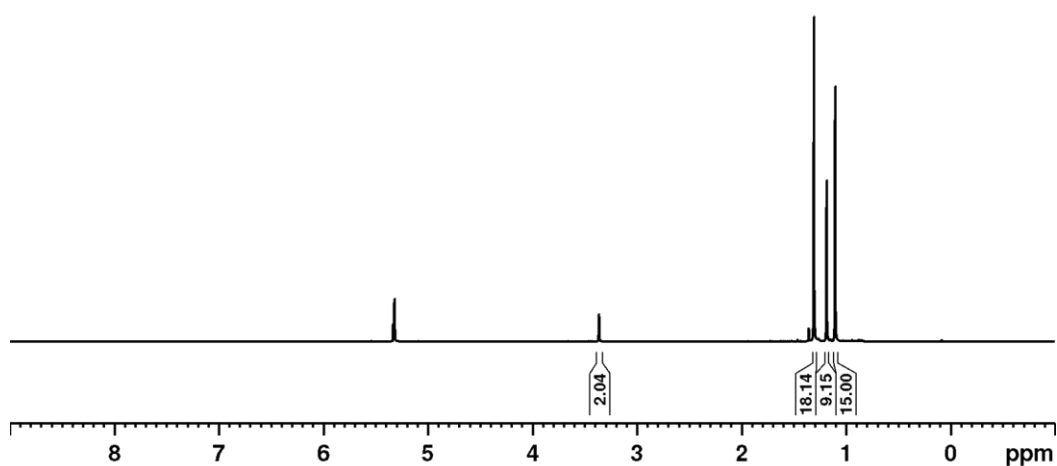

Figure S 17:  $^1\text{H}$  NMR spectrum of **1-Fe** in  $\text{CD}_2\text{Cl}_2$  recorded at room temperature.

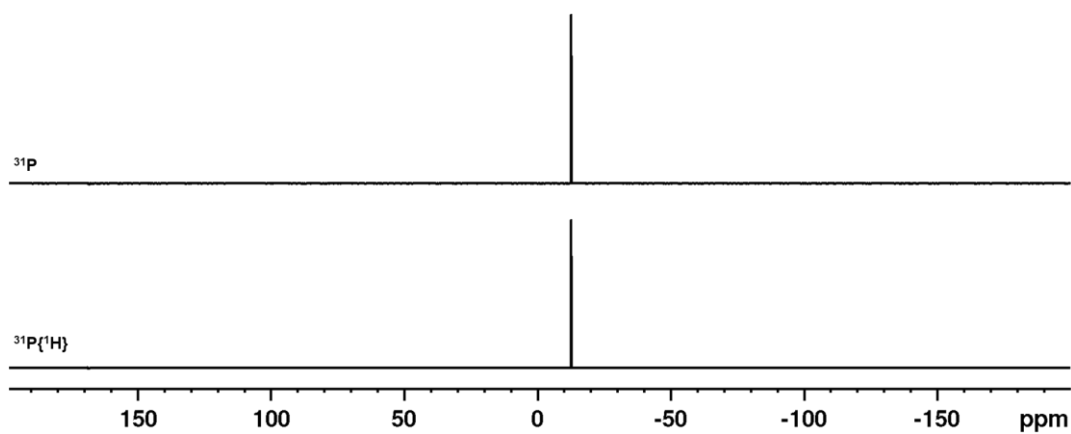

Figure S 18:  $^{31}\text{P}$  (top) and  $^{31}\text{P}\{^1\text{H}\}$  (bottom) NMR spectrum of **1-Fe** in  $\text{CD}_2\text{Cl}_2$  recorded at room temperature.



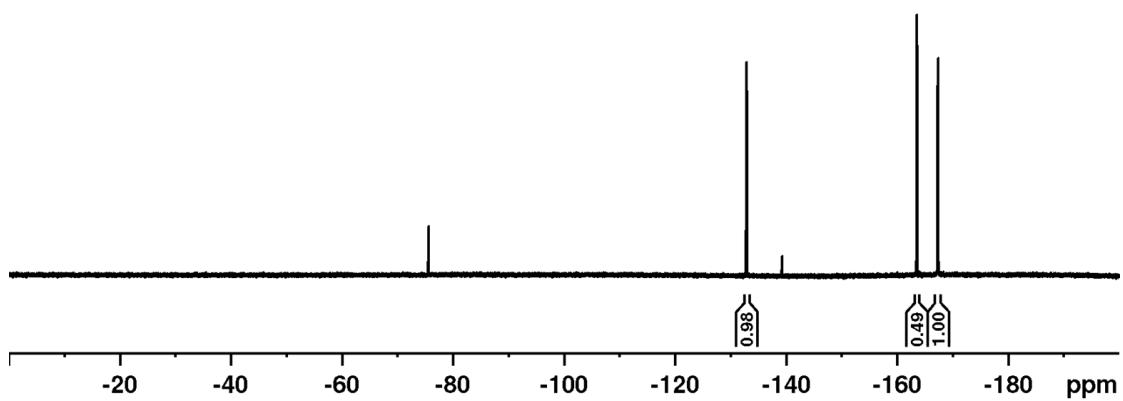

Figure S 19:  $^{19}\text{F}\{^1\text{H}\}$  NMR spectrum of **1-Fe** in  $\text{CD}_2\text{Cl}_2$  recorded at room temperature.

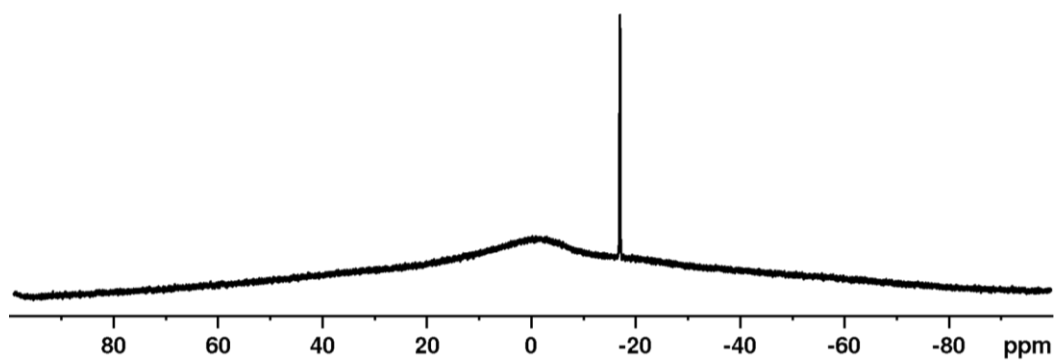

Figure S 20:  $^{11}\text{B}\{^1\text{H}\}$  NMR spectrum of **1-Fe** in  $\text{CD}_2\text{Cl}_2$  recorded at room temperature.

### 3.4.1-Co

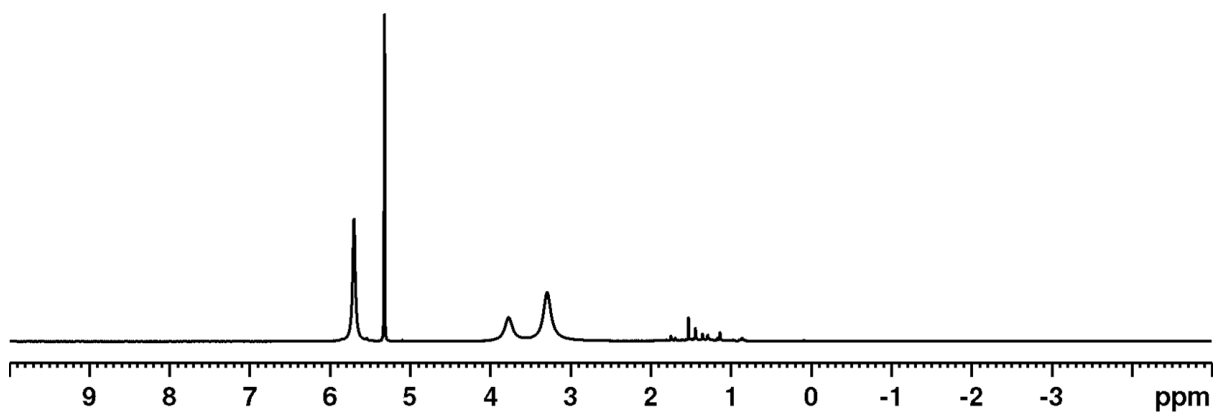

Figure S 21:  $^1\text{H}$  NMR spectrum of **1-Co** in  $\text{CD}_2\text{Cl}_2$  recorded at room temperature.

### 3.5. 1-Ni

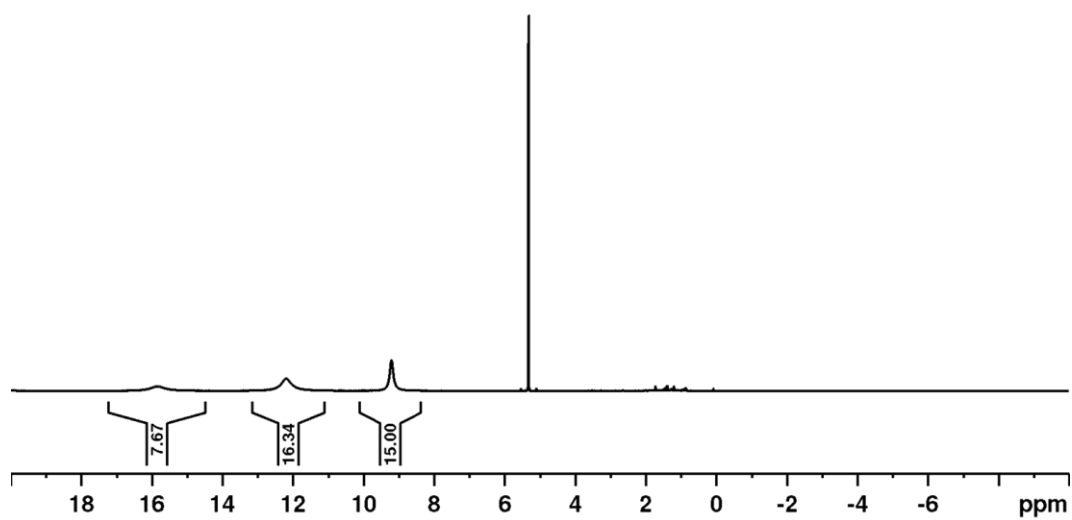

Figure S 22:  $^1\text{H}$  NMR spectrum of **1-Ni** in  $\text{CD}_2\text{Cl}_2$  recorded at room temperature.

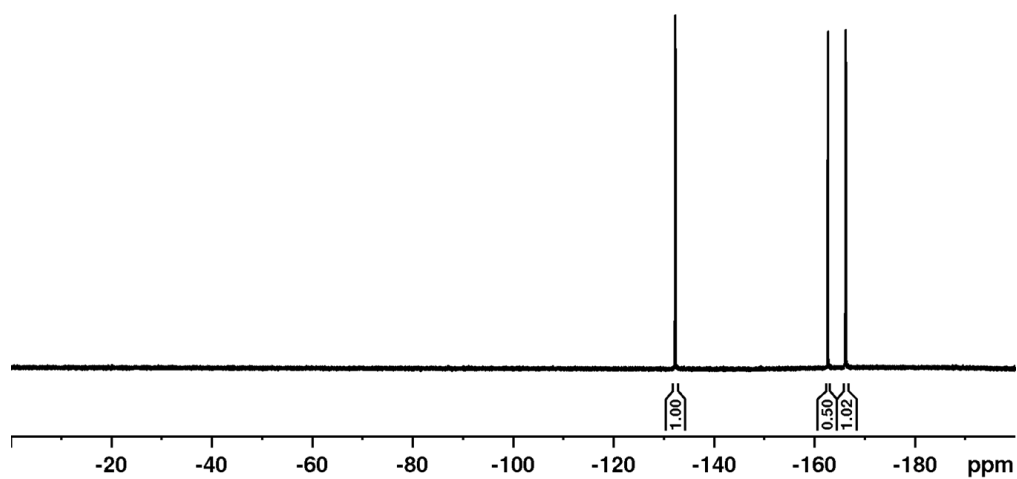

Figure S 23:  $^{19}\text{F}\{^1\text{H}\}$  NMR spectrum of **1-Ni** in  $\text{CD}_2\text{Cl}_2$  recorded at room temperature.

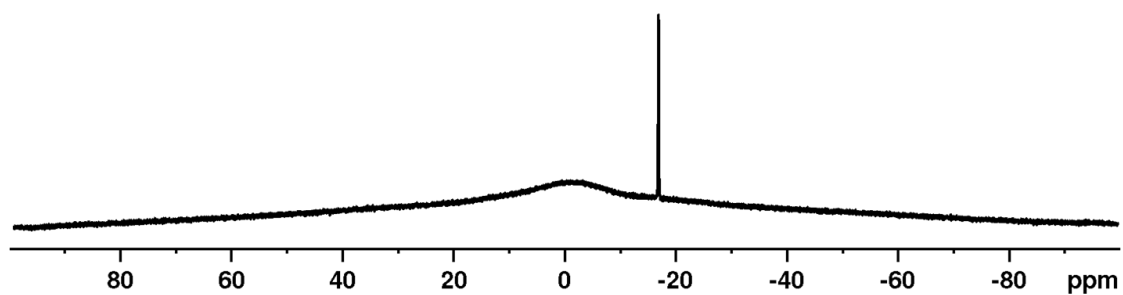

Figure S 24:  $^{11}\text{B}\{^1\text{H}\}$  NMR spectrum of **1-Ni** in  $\text{CD}_2\text{Cl}_2$  recorded at room temperature.

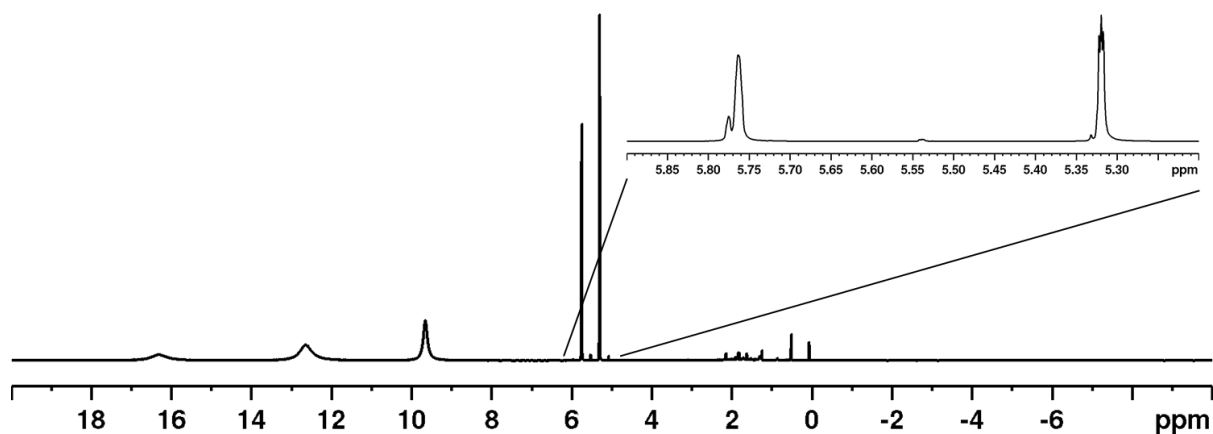

Figure S 25:  $^1\text{H}$  NMR spectrum of **1-Ni** in  $\text{CD}_2\text{Cl}_2$  recorded at room temperature; 18 mg of substance were dissolved in 0.6 mL of  $\text{CD}_2\text{Cl}_2$  inside the NMR tube and a coaxial capillary filled with  $\text{CD}_2\text{Cl}_2$  was added to determine the number of unpaired electrons in **1-Ni** via the Evans method.

### 3.6.2-Fe

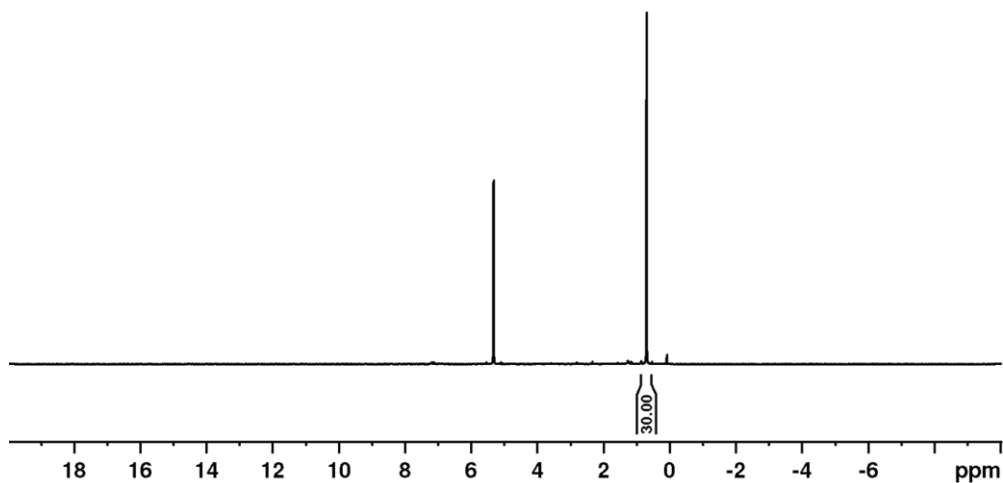

Figure S 26:  $^1\text{H}$  NMR spectrum of **2-Fe** in  $\text{CD}_2\text{Cl}_2$  recorded at room temperature.

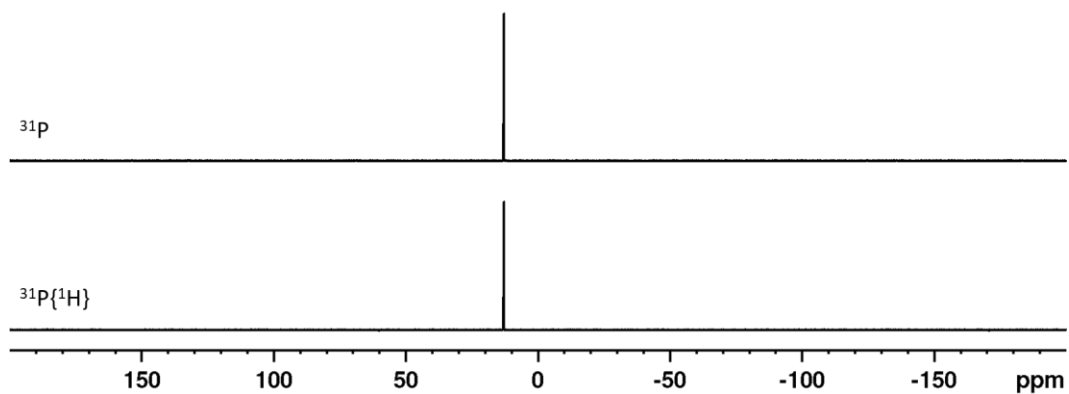

Figure S 27:  $^{31}\text{P}$  (top) and  $^{31}\text{P}\{^1\text{H}\}$  (bottom) NMR spectrum of **2-Fe** in  $\text{CD}_2\text{Cl}_2$  recorded at room temperature.

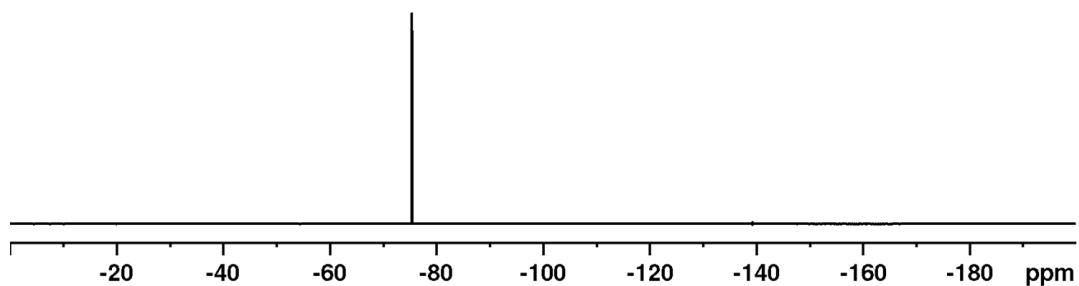

Figure S 28:  $^{19}\text{F}\{^1\text{H}\}$  NMR spectrum of **2-Fe** in  $\text{CD}_2\text{Cl}_2$  recorded at room temperature.

### 3.7.2-Co

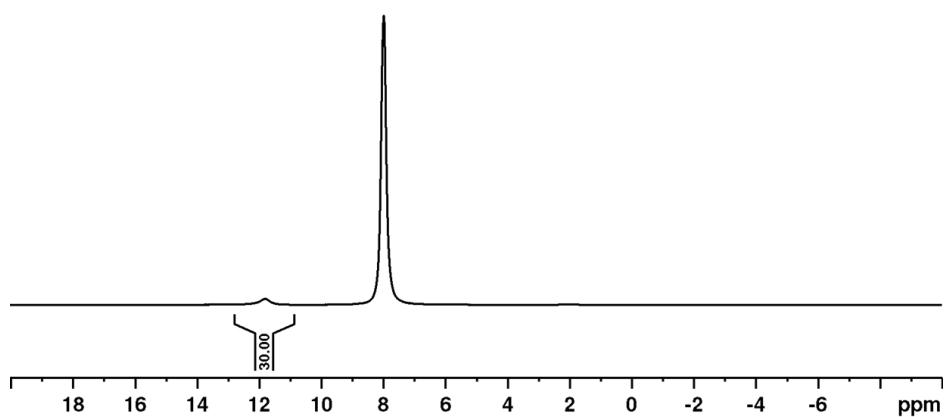

Figure S 29:  $^1\text{H}$  NMR spectrum of **2-Co** in *o*-DFB with added  $\text{C}_6\text{D}_6$  capillary recorded at room temperature.

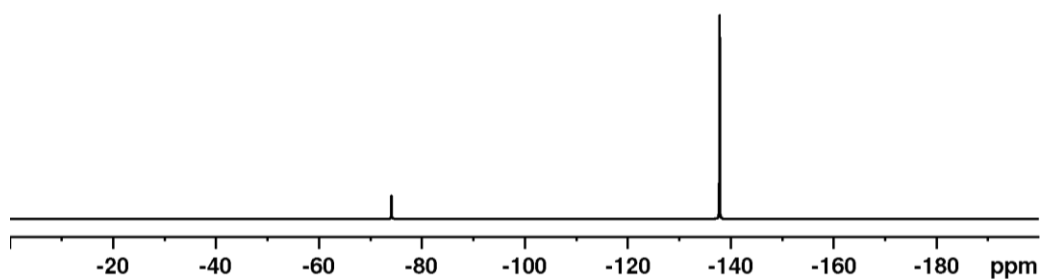

Figure S 30:  $^{19}\text{F}\{^1\text{H}\}$  NMR spectrum of **2-Co** in *o*-DFB with added  $\text{C}_6\text{D}_6$  capillary recorded at room temperature.

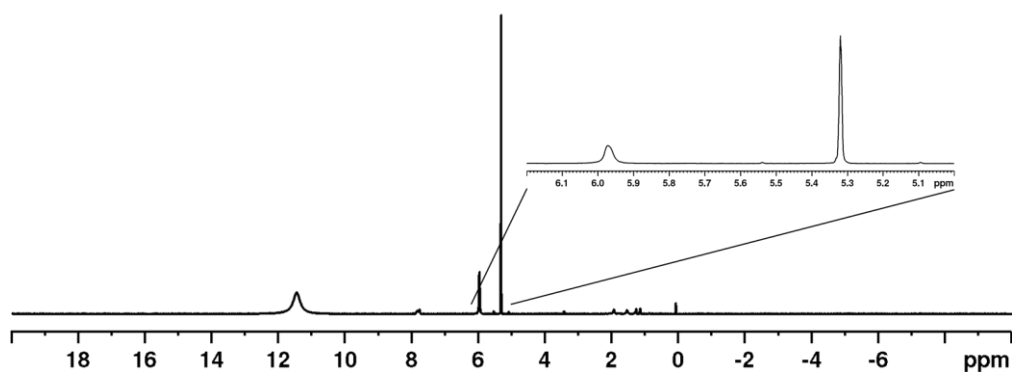

Figure S 31:  $^1\text{H}$  NMR spectrum of **2-Co** in  $\text{CD}_2\text{Cl}_2$  recorded at room temperature; 20 mg of substance were dissolved in 0.2 mL of  $\text{CD}_2\text{Cl}_2$  inside the NMR tube and a coaxial capillary filled with  $\text{CD}_2\text{Cl}_2$  was added to determine the number of unpaired electrons in **2-Co** via the Evans method.

### 3.8.3

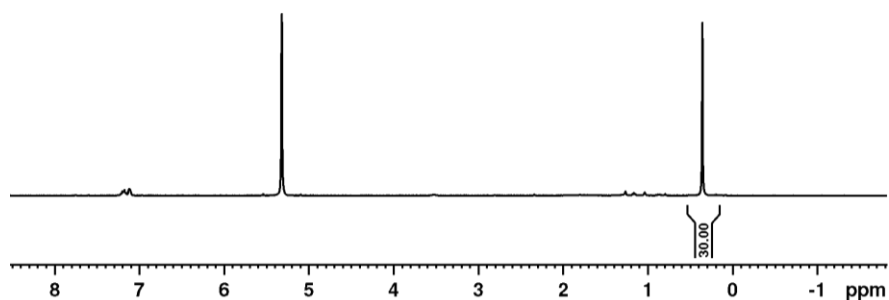

Figure S 32:  $^1\text{H}$  NMR spectrum of **3** in  $\text{CD}_2\text{Cl}_2$  recorded at room temperature with traces of *o*-DFB at  $\delta = 7.1$  ppm.

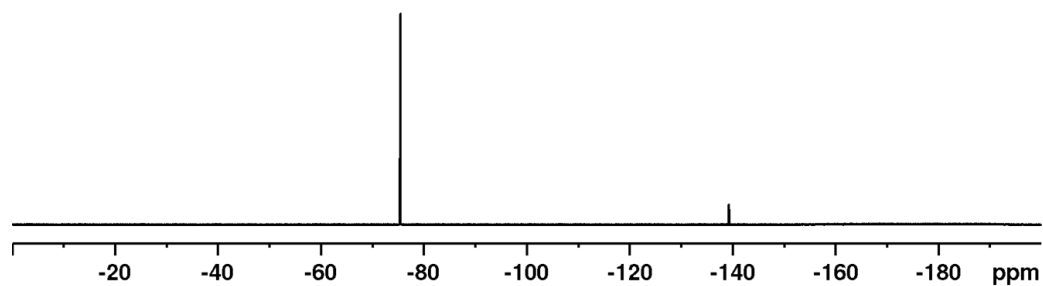

Figure S 33:  $^{19}\text{F}\{^1\text{H}\}$  NMR spectrum of **3** in  $\text{CD}_2\text{Cl}_2$  recorded at room temperature with traces of *o*-DFB at  $\delta = 140$  ppm.

### 3.9. $[\text{Fe}(\text{tol})_2][\text{pf}]_2$

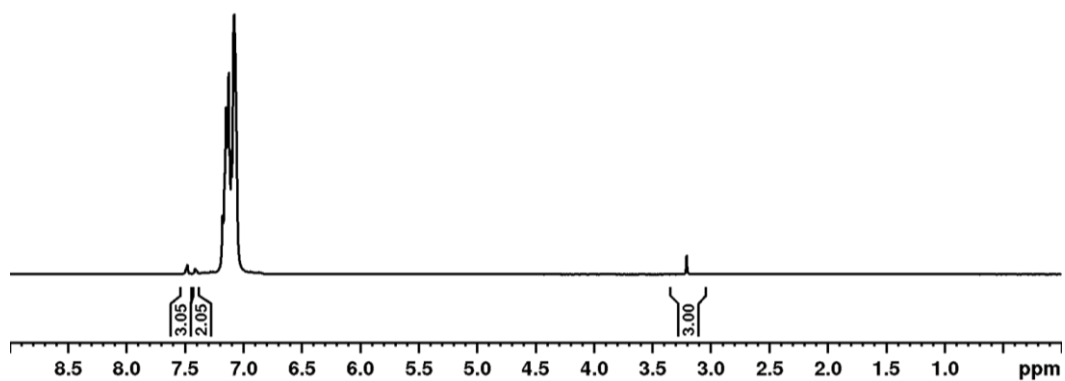

Figure S 34:  $^1\text{H}$  NMR spectrum of  $[\text{Fe}(\text{tol})_2][\text{pf}]_2$  in *o*-DFB with added  $\text{C}_6\text{D}_6$  capillary recorded at room temperature.

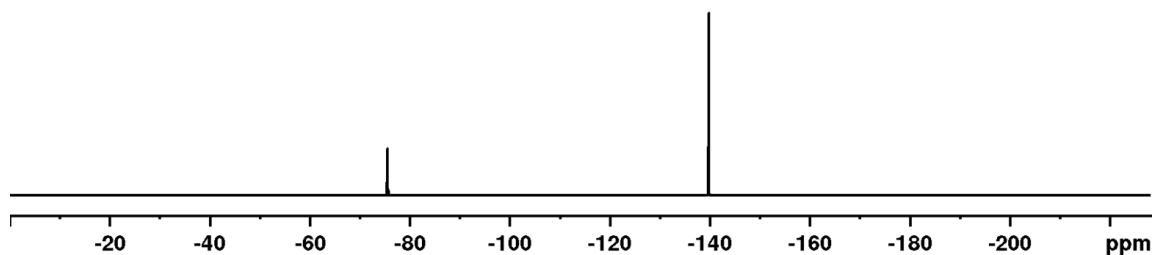

Figure S 35:  $^{19}\text{F}\{^1\text{H}\}$  NMR spectrum of  $[\text{Fe}(\text{tol})_2][\text{pf}]_2$  in *o*-DFB with added  $\text{C}_6\text{D}_6$  capillary recorded at room temperature.

## 4. Computational Data

### 4.1. General Remarks

DFT calculations were performed using the Orca 5.0 software package.<sup>16</sup> The sterically demanding Cp\* ligands in **2-Fe** and **2-Co** were replaced with unsubstituted Cp ligands to save computational resources. Geometry optimizations were performed at the  $\omega$ B97X-D3<sup>17</sup>/def2-TZVP<sup>18</sup> level of theory with PCM solvent correction for CH<sub>2</sub>Cl<sub>2</sub>.<sup>19</sup> Stationary points were verified by analytical frequency calculations. Single point calculations were performed at the  $\omega$ B97X-D3/def2-TZVP level of theory with solvent correction as described above.

### 4.2. Spin Density Distribution and Energetic Comparison

To gain insight into the electronic structure of especially the paramagnetic species **1-Mn**, **1-Ni** and **2-Co**, their spin densities were analysed (Figure S36). While the spin density in **1-Mn** is clearly localized at the Mn atom, the two unpaired electrons in **1-Ni** and **2-Co** are centred at the Ni and Co atoms, respectively. Only in **1-Ni**, minor contributions from the Cp''' ligand are apparent. As for both latter species a hypothetical singlet electron configuration would be possible and is transiently even observed for **1-Ni** in the solid state, the energetic separation between this singlet configuration and the experimentally observed triplet ground state was of interest. Thus, both the compounds **1-Ni** and **2-Co** were optimized as singlet as well as triplet configuration, the geometries compared, and the energetic separation determined (Figure S37). In both cases, the triplet configuration is 55.31 kJ/mol (**1-Ni**) and 127.17 kJ/mol (**2-Co**) more stable, respectively.

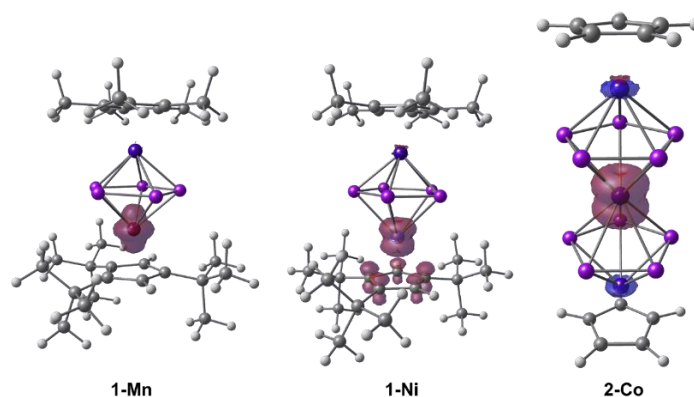

Figure S 36: Calculated spin density distribution for **1-Mn**, **1-Ni** and **2-Co**; surfaces are drawn at isovalues of 0.02, 0.01 and 0.01, respectively.

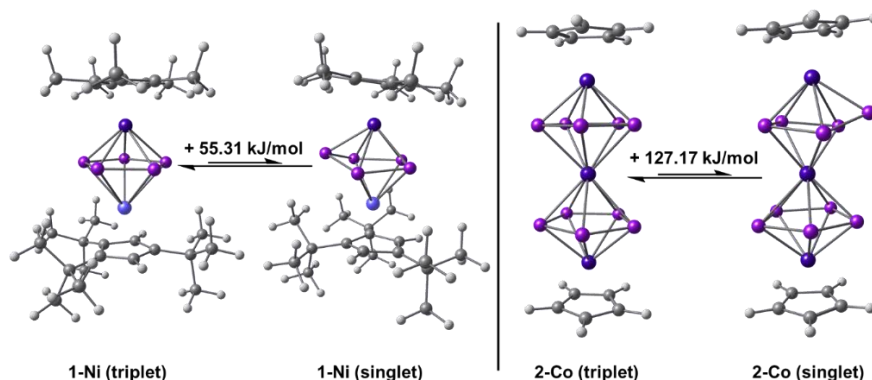

Figure S 37: Comparison of optimized molecular structures for **1-Ni** (left) and **2-Co** (right) in case of a singlet or triplet electronic configuration, each.

### 4.3. Optimized Geometries

#### 1-Mn

$\omega$ B97XD/def2TZVP (CPCM (CH<sub>2</sub>Cl<sub>2</sub>)): Energies/H = -5176.41492301, Enthalpies/H = -5176.41397880, Free Energies/H = -5176.51963493, ZPVE/ kcal/mol = 441.30

|    |              |             |              |
|----|--------------|-------------|--------------|
| Fe | 11.537949000 | 7.691020000 | 21.194182000 |
| Mn | 9.749845000  | 6.152922000 | 23.176102000 |
| P  | 11.907417000 | 7.105424000 | 23.481035000 |
| P  | 10.299426000 | 8.466773000 | 23.081553000 |
| P  | 11.776838000 | 5.500057000 | 22.072764000 |
| P  | 9.180285000  | 7.685969000 | 21.436635000 |
| P  | 10.067029000 | 5.830692000 | 20.840639000 |
| C  | 7.707775000  | 5.666106000 | 23.631510000 |
| C  | 8.481336000  | 4.499285000 | 23.434186000 |
| H  | 8.294496000  | 3.766067000 | 22.668105000 |
| C  | 6.349321000  | 5.958460000 | 23.023769000 |
| C  | 9.520927000  | 4.405682000 | 24.410581000 |
| C  | 8.319411000  | 6.347626000 | 24.705442000 |
| H  | 7.980915000  | 7.291468000 | 25.098481000 |
| C  | 11.753465000 | 9.480438000 | 20.164545000 |
| C  | 12.877701000 | 9.264115000 | 21.013326000 |
| C  | 10.315698000 | 3.096722000 | 24.561365000 |
| C  | 11.679533000 | 8.393674000 | 19.246168000 |
| C  | 9.415428000  | 5.597417000 | 25.230491000 |
| C  | 8.983985000  | 5.515516000 | 27.640096000 |
| H  | 8.873435000  | 4.432065000 | 27.601079000 |
| H  | 7.999267000  | 5.960832000 | 27.484914000 |
| H  | 9.326815000  | 5.788155000 | 28.640442000 |
| C  | 11.845267000 | 3.233284000 | 24.580950000 |
| H  | 12.238938000 | 3.291853000 | 23.566848000 |
| H  | 12.278019000 | 2.343569000 | 25.043475000 |
| H  | 12.201043000 | 4.101243000 | 25.123190000 |
| C  | 5.967831000  | 7.433335000 | 23.158982000 |
| H  | 5.949269000  | 7.749406000 | 24.203420000 |

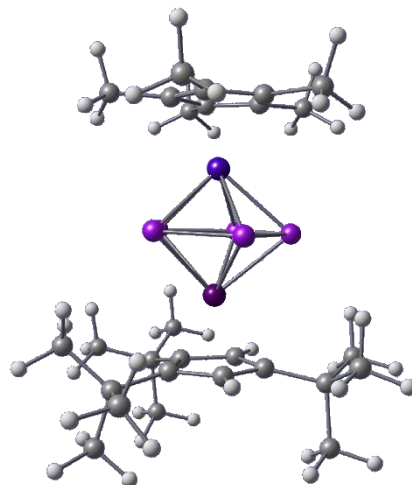

|   |              |             |              |
|---|--------------|-------------|--------------|
| H | 4.967972000  | 7.588491000 | 22.749361000 |
| H | 6.655441000  | 8.083454000 | 22.615632000 |
| C | 12.760610000 | 7.507749000 | 19.524673000 |
| C | 9.989981000  | 6.029348000 | 26.590508000 |
| C | 9.826442000  | 2.415849000 | 25.852270000 |
| H | 10.160820000 | 2.933762000 | 26.748914000 |
| H | 10.218806000 | 1.397799000 | 25.893751000 |
| H | 8.735694000  | 2.362603000 | 25.875222000 |
| C | 11.384119000 | 5.512854000 | 26.939925000 |
| H | 12.129597000 | 5.850583000 | 26.218129000 |
| H | 11.431544000 | 4.429610000 | 27.011260000 |
| H | 11.666948000 | 5.913297000 | 27.915079000 |
| C | 6.256293000  | 5.524214000 | 21.559866000 |
| H | 6.874707000  | 6.144987000 | 20.910846000 |
| H | 5.223087000  | 5.617728000 | 21.220225000 |
| H | 6.555989000  | 4.483371000 | 21.425665000 |
| C | 13.501481000 | 8.045873000 | 20.615666000 |
| C | 5.357138000  | 5.116252000 | 23.848131000 |
| H | 5.573529000  | 4.050375000 | 23.751083000 |
| H | 4.339466000  | 5.294105000 | 23.494166000 |
| H | 5.403869000  | 5.381109000 | 24.906589000 |
| C | 10.050439000 | 7.559772000 | 26.718892000 |
| H | 10.384654000 | 7.809413000 | 27.727202000 |
| H | 9.084507000  | 8.042354000 | 26.574528000 |
| H | 10.764397000 | 7.996559000 | 26.019554000 |
| C | 9.988068000  | 2.140934000 | 23.403942000 |
| H | 8.940845000  | 1.834105000 | 23.404428000 |
| H | 10.595973000 | 1.241337000 | 23.513156000 |
| H | 10.223105000 | 2.583901000 | 22.433244000 |
| C | 10.686905000 | 8.244623000 | 18.141129000 |
| H | 10.480124000 | 7.196329000 | 17.926000000 |
| H | 11.079955000 | 8.700634000 | 17.229366000 |



|   |              |              |              |
|---|--------------|--------------|--------------|
| H | 9.744094000  | 8.736103000  | 18.380669000 |
| C | 13.095331000 | 6.270670000  | 18.760023000 |
| H | 13.600447000 | 5.535076000  | 19.385384000 |
| H | 13.761922000 | 6.519648000  | 17.930916000 |
| H | 12.202406000 | 5.806418000  | 18.341789000 |
| C | 13.356450000 | 10.184382000 | 22.087288000 |
| H | 12.531814000 | 10.734421000 | 22.540154000 |
| H | 14.055816000 | 10.912161000 | 21.669261000 |
| H | 13.874111000 | 9.641536000  | 22.877936000 |
| C | 10.854121000 | 10.671616000 | 20.187289000 |
| H | 9.838075000  | 10.414405000 | 19.887723000 |
| H | 11.226169000 | 11.426169000 | 19.490172000 |
| H | 10.813034000 | 11.123557000 | 21.177985000 |
| C | 14.751667000 | 7.470743000  | 21.192736000 |
| H | 14.846302000 | 7.697020000  | 22.254706000 |
| H | 15.620157000 | 7.894430000  | 20.682877000 |
| H | 14.788716000 | 6.388397000  | 21.071914000 |

### 1-Ni (triplet)

$\omega$ B97XD/def2TZVP (CPCM (CH<sub>2</sub>Cl<sub>2</sub>)): Energies/H = -5533.77609673, Enthalpies/H = -5533.77515253, Free Energies/H = -5533.88116412, ZPVE/ kcal/mol = 439.97

|    |              |             |              |
|----|--------------|-------------|--------------|
| C  | 5.323371000  | 8.615463000 | 20.265968000 |
| Ni | 7.803515000  | 4.062555000 | 19.865378000 |
| P  | 7.868925000  | 5.829919000 | 17.999674000 |
| P  | 5.678036000  | 5.291258000 | 20.574025000 |
| P  | 5.937916000  | 5.113278000 | 18.479408000 |
| P  | 8.811134000  | 6.435977000 | 19.793535000 |
| C  | 9.327822000  | 2.633908000 | 19.166084000 |
| C  | 9.463603000  | 2.858590000 | 20.554932000 |
| H  | 10.337472000 | 3.282306000 | 21.020783000 |
| C  | 8.036736000  | 2.093799000 | 18.990014000 |
| H  | 7.616448000  | 1.815418000 | 18.037675000 |
| C  | 8.302529000  | 2.418407000 | 21.254779000 |
| C  | 7.381517000  | 1.925414000 | 20.246051000 |
| Fe | 6.580160000  | 7.171919000 | 19.450461000 |
| P  | 7.453088000  | 6.121182000 | 21.379291000 |
| C  | 10.421801000 | 2.738547000 | 18.123754000 |
| C  | 8.292278000  | 2.378036000 | 22.790797000 |
| C  | 6.073489000  | 1.121453000 | 20.286401000 |
| C  | 6.999883000  | 9.088230000 | 18.754917000 |
| C  | 6.642798000  | 9.137330000 | 20.133956000 |
| C  | 5.901665000  | 8.535282000 | 18.035096000 |
| C  | 4.865399000  | 8.242130000 | 18.968734000 |
| C  | 9.845313000  | 2.868315000 | 16.712243000 |
| H  | 9.220054000  | 2.012231000 | 16.452597000 |
| H  | 10.659149000 | 2.918204000 | 15.986023000 |
| H  | 9.245230000  | 3.773499000 | 16.603146000 |
| C  | 11.225432000 | 1.427804000 | 18.209436000 |
| H  | 11.672226000 | 1.308229000 | 19.198692000 |
| H  | 12.028281000 | 1.431150000 | 17.468379000 |
| H  | 10.584211000 | 0.564925000 | 18.017468000 |

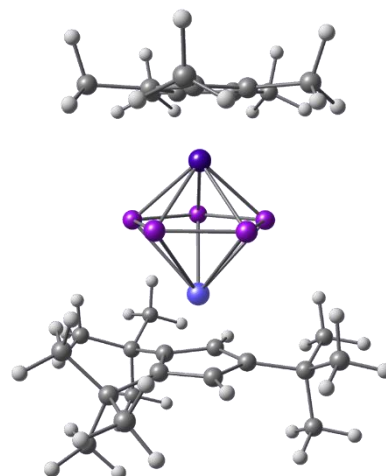

|   |              |              |              |
|---|--------------|--------------|--------------|
| C | 11.365329000 | 3.910753000  | 18.404663000 |
| H | 10.854947000 | 4.870768000  | 18.312838000 |
| H | 12.187569000 | 3.901319000  | 17.686255000 |
| H | 11.798574000 | 3.850691000  | 19.404595000 |
| C | 7.158599000  | 3.177534000  | 23.448501000 |
| H | 7.366833000  | 4.246797000  | 23.394861000 |
| H | 7.095698000  | 2.912333000  | 24.506333000 |
| H | 6.186786000  | 3.006188000  | 22.999325000 |
| C | 9.598467000  | 2.969080000  | 23.344033000 |
| H | 10.472812000 | 2.390257000  | 23.041203000 |
| H | 9.553831000  | 2.959048000  | 24.434602000 |
| H | 9.738380000  | 4.005333000  | 23.028086000 |
| C | 8.246458000  | 0.910515000  | 23.246565000 |
| H | 7.287232000  | 0.438159000  | 23.046530000 |
| H | 8.420987000  | 0.857097000  | 24.323466000 |
| H | 9.023210000  | 0.327779000  | 22.746362000 |
| C | 5.252733000  | 1.354011000  | 19.007236000 |
| H | 4.975628000  | 2.403728000  | 18.894620000 |
| H | 4.331360000  | 0.772182000  | 19.066978000 |
| H | 5.775057000  | 1.037090000  | 18.105352000 |
| C | 6.466503000  | -0.367251000 | 20.320219000 |
| H | 7.060564000  | -0.628497000 | 19.442077000 |
| H | 5.567453000  | -0.988216000 | 20.322023000 |
| H | 7.051039000  | -0.613213000 | 21.206439000 |
| C | 5.134196000  | 1.421218000  | 21.454426000 |
| H | 5.561507000  | 1.167921000  | 22.420736000 |
| H | 4.227779000  | 0.824393000  | 21.336264000 |
| H | 4.836895000  | 2.471897000  | 21.466877000 |
| C | 8.267035000  | 9.599290000  | 18.155115000 |
| H | 9.096899000  | 9.541603000  | 18.858619000 |
| H | 8.139248000  | 10.646583000 | 17.871311000 |
| H | 8.539090000  | 9.040281000  | 17.259958000 |

|   |             |              |              |
|---|-------------|--------------|--------------|
| C | 7.472840000 | 9.711802000  | 21.233234000 |
| H | 7.261271000 | 10.779207000 | 21.331082000 |
| H | 8.537954000 | 9.599235000  | 21.032455000 |
| H | 7.254964000 | 9.239062000  | 22.190523000 |
| C | 5.820920000 | 8.365410000  | 16.554673000 |
| H | 6.803758000 | 8.195217000  | 16.116179000 |
| H | 5.406724000 | 9.271757000  | 16.106727000 |
| H | 5.174806000 | 7.531842000  | 16.280469000 |
| C | 3.511007000 | 7.710305000  | 18.638618000 |
| H | 3.109755000 | 7.101782000  | 19.448897000 |
| H | 3.528911000 | 7.104436000  | 17.733158000 |
| H | 2.821911000 | 8.541589000  | 18.472248000 |
| C | 4.531625000 | 8.548623000  | 21.529197000 |
| H | 3.797649000 | 7.743895000  | 21.500069000 |
| H | 3.994011000 | 9.488967000  | 21.671654000 |
| H | 5.173315000 | 8.395043000  | 22.396549000 |

## 1-Ni (singlet)

$\omega$ B97XD/def2TZVP (CPCM (CH<sub>2</sub>Cl<sub>2</sub>)): Energies/H = -5533.75348611, Enthalpies/H = -5533.75254190, Free Energies/H = -5533.86009630, ZPVE/ kcal/mol = 440.62

|    |              |             |              |
|----|--------------|-------------|--------------|
| C  | 5.323371000  | 8.615463000 | 20.265968000 |
| Ni | 7.803515000  | 4.062555000 | 19.865378000 |
| P  | 7.868925000  | 5.829919000 | 17.999674000 |
| P  | 5.678036000  | 5.291258000 | 20.574025000 |
| P  | 5.937916000  | 5.113278000 | 18.479408000 |
| P  | 8.811134000  | 6.435977000 | 19.793535000 |
| C  | 9.327822000  | 2.633908000 | 19.166084000 |
| C  | 9.463603000  | 2.858590000 | 20.554932000 |
| H  | 10.337472000 | 3.282306000 | 21.020783000 |
| C  | 8.036736000  | 2.093799000 | 18.990014000 |
| H  | 7.616448000  | 1.815418000 | 18.037675000 |
| C  | 8.302529000  | 2.418407000 | 21.254779000 |
| C  | 7.381517000  | 1.925414000 | 20.246051000 |
| Fe | 6.580160000  | 7.171919000 | 19.450461000 |
| P  | 7.453088000  | 6.121182000 | 21.379291000 |
| C  | 10.421801000 | 2.738547000 | 18.123754000 |
| C  | 8.292278000  | 2.378036000 | 22.790797000 |
| C  | 6.073489000  | 1.121453000 | 20.286401000 |
| C  | 6.999883000  | 9.088230000 | 18.754917000 |
| C  | 6.642798000  | 9.137330000 | 20.133956000 |
| C  | 5.901665000  | 8.535282000 | 18.035096000 |
| C  | 4.865399000  | 8.242130000 | 18.968734000 |
| C  | 9.845313000  | 2.868315000 | 16.712243000 |
| H  | 9.220054000  | 2.012231000 | 16.452597000 |
| H  | 10.659149000 | 2.918204000 | 15.986023000 |
| H  | 9.245230000  | 3.773499000 | 16.603146000 |
| C  | 11.225432000 | 1.427804000 | 18.209436000 |
| H  | 11.672226000 | 1.308229000 | 19.198692000 |
| H  | 12.028281000 | 1.431150000 | 17.468379000 |
| H  | 10.584211000 | 0.564925000 | 18.017468000 |

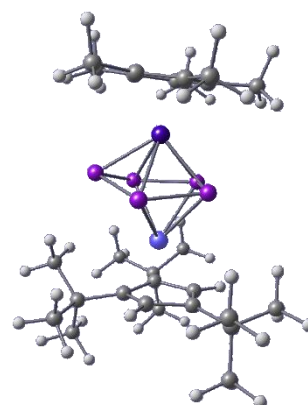

|   |              |              |              |
|---|--------------|--------------|--------------|
| C | 11.365329000 | 3.910753000  | 18.404663000 |
| H | 10.854947000 | 4.870768000  | 18.312838000 |
| H | 12.187569000 | 3.901319000  | 17.686255000 |
| H | 11.798574000 | 3.850691000  | 19.404595000 |
| C | 7.158599000  | 3.177534000  | 23.448501000 |
| H | 7.366833000  | 4.246797000  | 23.394861000 |
| H | 7.095698000  | 2.912333000  | 24.506333000 |
| H | 6.186786000  | 3.006188000  | 22.999325000 |
| C | 9.598467000  | 2.969080000  | 23.344033000 |
| H | 10.472812000 | 2.390257000  | 23.041203000 |
| H | 9.553831000  | 2.959048000  | 24.434602000 |
| H | 9.738380000  | 4.005333000  | 23.028086000 |
| C | 8.246458000  | 0.910515000  | 23.246565000 |
| H | 7.287232000  | 0.438159000  | 23.046530000 |
| H | 8.420987000  | 0.857097000  | 24.323466000 |
| H | 9.023210000  | 0.327779000  | 22.746362000 |
| C | 5.252733000  | 1.354011000  | 19.007236000 |
| H | 4.975628000  | 2.403728000  | 18.894620000 |
| H | 4.331360000  | 0.772182000  | 19.066978000 |
| H | 5.775057000  | 1.037090000  | 18.105352000 |
| C | 6.466503000  | -0.367251000 | 20.320219000 |
| H | 7.060564000  | -0.628497000 | 19.442077000 |
| H | 5.567453000  | -0.988216000 | 20.322023000 |
| H | 7.051039000  | -0.613213000 | 21.206439000 |
| C | 5.134196000  | 1.421218000  | 21.454426000 |
| H | 5.561507000  | 1.167921000  | 22.420736000 |
| H | 4.227779000  | 0.824393000  | 21.336264000 |
| H | 4.836895000  | 2.471897000  | 21.466877000 |
| C | 8.267035000  | 9.599290000  | 18.155115000 |
| H | 9.096899000  | 9.541603000  | 18.858619000 |
| H | 8.139248000  | 10.646583000 | 17.871311000 |
| H | 8.539090000  | 9.040281000  | 17.259958000 |

|   |             |              |              |
|---|-------------|--------------|--------------|
| C | 7.472840000 | 9.711802000  | 21.233234000 |
| H | 7.261271000 | 10.779207000 | 21.331082000 |
| H | 8.537954000 | 9.599235000  | 21.032455000 |
| H | 7.254964000 | 9.239062000  | 22.190523000 |
| C | 5.820920000 | 8.365410000  | 16.554673000 |
| H | 6.803758000 | 8.195217000  | 16.116179000 |
| H | 5.406724000 | 9.271757000  | 16.106727000 |
| H | 5.174806000 | 7.531842000  | 16.280469000 |
| C | 3.511007000 | 7.710305000  | 18.638618000 |
| H | 3.109755000 | 7.101782000  | 19.448897000 |
| H | 3.528911000 | 7.104436000  | 17.733158000 |
| H | 2.821911000 | 8.541589000  | 18.472248000 |
| C | 4.531625000 | 8.548623000  | 21.529197000 |
| H | 3.797649000 | 7.743895000  | 21.500069000 |
| H | 3.994011000 | 9.488967000  | 21.671654000 |
| H | 5.173315000 | 8.395043000  | 22.396549000 |

## 2-Fe'

@B97XD/def2TZVP (CPCM (CH<sub>2</sub>Cl<sub>2</sub>)): Energies/H = -7591.66093026, Enthalpies/H = -7591.65998606, Free Energies/H = -7591.73656363, ZPVE/ kcal/mol = 124.09

|    |             |              |              |
|----|-------------|--------------|--------------|
| Fe | 3.832713000 | 2.015632000  | 14.356746000 |
| Fe | 3.813755000 | 5.201005000  | 14.509974000 |
| Fe | 3.790546000 | 8.385606000  | 14.662908000 |
| P  | 2.222021000 | 3.502489000  | 15.265999000 |
| P  | 2.532311000 | 3.603941000  | 13.166905000 |
| P  | 2.509027000 | 6.903730000  | 13.329164000 |
| P  | 2.202119000 | 6.799588000  | 15.429352000 |
| P  | 4.603273000 | 6.933537000  | 12.971410000 |
| P  | 4.126091000 | 3.465271000  | 16.209118000 |
| P  | 4.627220000 | 3.632686000  | 12.812439000 |
| P  | 5.590300000 | 6.852922000  | 14.851766000 |
| P  | 5.612336000 | 3.549021000  | 14.692867000 |
| P  | 4.106910000 | 6.767194000  | 16.370100000 |
| C  | 2.995844000 | 0.370799000  | 13.418235000 |
| C  | 4.021607000 | 0.280729000  | 15.469761000 |
| C  | 4.398681000 | 0.388197000  | 13.208236000 |
| C  | 2.762899000 | 0.303750000  | 14.816011000 |
| C  | 5.032479000 | 0.332946000  | 14.476081000 |
| H  | 4.896448000 | 0.453919000  | 12.252641000 |
| H  | 6.097009000 | 0.349619000  | 14.654507000 |
| C  | 4.970652000 | 10.066872000 | 14.910977000 |
| H  | 2.238500000 | 0.421224000  | 12.650655000 |
| C  | 2.909602000 | 10.097164000 | 13.901483000 |
| C  | 4.306971000 | 10.119792000 | 13.658353000 |
| H  | 4.181687000 | 0.251168000  | 16.536923000 |
| C  | 2.709780000 | 10.030880000 | 15.304277000 |
| H  | 1.797225000 | 0.294329000  | 15.298293000 |
| C  | 3.983600000 | 10.011946000 | 15.928175000 |
| H  | 6.039332000 | 10.048992000 | 15.062015000 |
| H  | 4.781597000 | 10.148373000 | 12.689268000 |

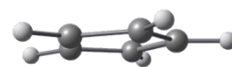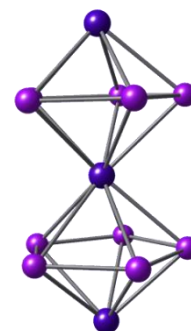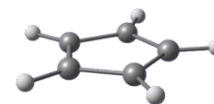



|   |             |              |              |
|---|-------------|--------------|--------------|
| H | 1.756099000 | 9.980607000  | 15.807564000 |
| H | 4.168903000 | 9.945178000  | 16.989501000 |
| H | 2.134565000 | 10.105497000 | 13.150093000 |

**2-Co'** (triplet)

$\omega$ B97XD/def2TZVP (CPCM (CH<sub>2</sub>Cl<sub>2</sub>)): Energies/H = -7710.95679967, Enthalpies/H = -7710.95585546, Free Energies/H = -7711.03591349, ZPVE/ kcal/mol = 123.19

|    |              |              |              |
|----|--------------|--------------|--------------|
| Fe | 7.522234000  | 12.483643000 | 12.579632000 |
| Fe | 11.974036000 | 16.328787000 | 15.913898000 |
| Co | 9.750639000  | 14.405681000 | 14.243586000 |
| P  | 10.911286000 | 14.284925000 | 16.524974000 |
| P  | 12.225338000 | 14.203733000 | 14.865862000 |
| P  | 8.524832000  | 12.208109000 | 14.724003000 |
| P  | 9.831632000  | 12.136245000 | 13.058601000 |
| P  | 11.771595000 | 15.833612000 | 13.590770000 |
| P  | 9.647310000  | 15.966567000 | 16.277686000 |
| P  | 10.177761000 | 16.921645000 | 14.463326000 |
| P  | 7.255268000  | 13.887160000 | 14.488150000 |
| P  | 9.368022000  | 13.769000000 | 11.791424000 |
| P  | 7.776578000  | 14.851581000 | 12.675701000 |
| C  | 6.959468000  | 11.799005000 | 10.711671000 |
| C  | 7.272053000  | 10.704155000 | 11.557324000 |
| C  | 5.893657000  | 12.521672000 | 11.306074000 |
| C  | 13.050173000 | 16.513178000 | 17.669842000 |
| C  | 6.399380000  | 10.750102000 | 12.674434000 |
| C  | 5.547800000  | 11.873657000 | 12.519350000 |
| H  | 7.461076000  | 12.052135000 | 9.790523000  |
| H  | 8.052992000  | 9.978227000  | 11.391954000 |
| C  | 13.933523000 | 16.448977000 | 16.562042000 |
| C  | 12.208608000 | 17.641176000 | 17.494659000 |
| H  | 5.443043000  | 13.420839000 | 10.915281000 |
| H  | 4.787046000  | 12.193986000 | 13.214224000 |
| H  | 6.400238000  | 10.065498000 | 13.508416000 |
| C  | 13.637854000 | 17.537589000 | 15.702246000 |
| C  | 12.571691000 | 18.274274000 | 16.278426000 |
| H  | 13.009032000 | 15.812440000 | 18.489295000 |
| H  | 14.682248000 | 15.691048000 | 16.391219000 |
| H  | 11.414847000 | 17.948222000 | 18.157875000 |
| H  | 12.102553000 | 19.148237000 | 15.853800000 |
| H  | 14.122589000 | 17.752394000 | 14.762531000 |

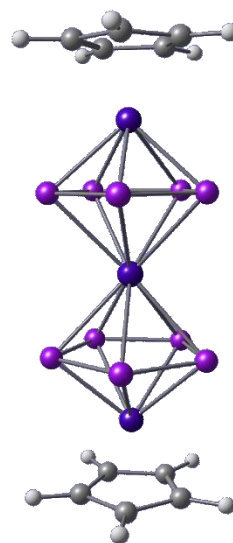

**2-Co'** (singlet)

$\omega$ B97XD/def2TZVP (CPCM (CH<sub>2</sub>Cl<sub>2</sub>)): Energies/H = -7710.90921936, Enthalpies/H = -7710.90827516, Free Energies/H = -7710.98747581, ZPVE/ kcal/mol = 123.07

|    |              |              |              |
|----|--------------|--------------|--------------|
| Fe | 7.619011000  | 12.475142000 | 12.650199000 |
| Fe | 11.864829000 | 16.385590000 | 15.837958000 |
| Co | 9.736019000  | 14.309834000 | 14.246688000 |
| P  | 10.822598000 | 14.337733000 | 16.381160000 |
| P  | 12.084765000 | 14.329193000 | 14.695537000 |
| P  | 8.632946000  | 12.114136000 | 14.781731000 |
| P  | 9.913733000  | 12.055851000 | 13.119032000 |
| P  | 11.335827000 | 15.938651000 | 13.464929000 |
| P  | 9.436045000  | 15.948722000 | 15.998734000 |
| P  | 10.179517000 | 17.329122000 | 14.572449000 |
| P  | 7.399194000  | 13.851844000 | 14.585855000 |
| P  | 9.486059000  | 13.774950000 | 11.920305000 |
| P  | 7.856161000  | 14.839078000 | 12.766486000 |
| C  | 7.091087000  | 11.780117000 | 10.774894000 |
| C  | 7.306979000  | 10.688882000 | 11.653649000 |
| C  | 6.045552000  | 12.574159000 | 11.311462000 |
| C  | 12.981564000 | 16.368799000 | 17.579902000 |
| C  | 6.395003000  | 10.808255000 | 12.734193000 |
| C  | 5.616445000  | 11.973846000 | 12.523170000 |
| H  | 7.643621000  | 11.983655000 | 9.870517000  |
| H  | 8.051455000  | 9.917081000  | 11.533334000 |
| C  | 13.840617000 | 16.342441000 | 16.448713000 |
| C  | 12.202101000 | 17.549931000 | 17.510693000 |
| H  | 5.659136000  | 13.486928000 | 10.884889000 |
| H  | 4.850460000  | 12.352351000 | 13.182473000 |
| H  | 6.324454000  | 10.144951000 | 13.582455000 |
| C  | 13.591422000 | 17.508108000 | 15.682126000 |
| C  | 12.582396000 | 18.257366000 | 16.340461000 |
| H  | 12.921057000 | 15.613502000 | 18.348226000 |
| H  | 14.549166000 | 15.564680000 | 16.208785000 |
| H  | 11.434367000 | 17.843859000 | 18.209641000 |
| H  | 12.168242000 | 19.193545000 | 16.001336000 |
| H  | 14.064572000 | 17.765196000 | 14.746815000 |

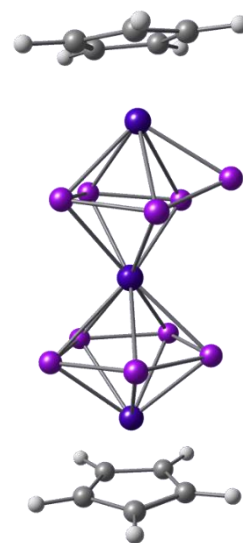

#### 4.4. References

- 1 O. J. Scherer and T. Brück, *Angew. Chem. Int. Ed. Engl.* 1987, **26**, 59.
- 2 O. J. Scherer, C. Blath and G. Wolmershäuser, *J. Organomet. Chem.*, 1990, **387**, C21.
- 3 M. Kreye, C. G. Daniliuc, M. Freytag, P. G. Jones and M. D. Walter, *Dalt. Trans.*, 2014, **43**, 9052.
- 4 M. Kaekawa, M. Römel, C. G. Daniliuc, P. G. Jones, P. S. White, F. Neese and M. D. Walter, *Chem. Sci.*, 2012, **3**, 2972.
- 5 M. Wallasch, G. Wolmershäuser and H. Sitzmann, *Angew. Chem. Int. Ed.*, 2005, **44**, 2597.
- 6 F. Baumann, E. Dormann, Y. Ehleiter, W. Kaim, J. Kärcher, M. Kelemen, R. Krammer, D. Saurenz, D. Stalke, C. Wachter, G. Wolmershäuser and H. Sitzmann, *J. Organomet. Chem.*, 1999, **587**, 267.
- 7 M. Schär, D. Saurenz, F. Zimmer, I. Schädlich, G. Wolmershäuser, S. Demeshko, F. Meyer, H. Sitzmann, O. M. Heigl and F. H. Köhler, *Organometallics*, 2013, **32**, 6298.
- 8 V. D. Makhaev, A. N. Galiullin, E. E. Faingol'd, N. M. Bravaya and L. A. Petrova, *Russ. Chem. Bull.*, 2014, **63**, 651.
- 9 M. Gonsior, I. Krossing and N. Mitzel, *Z. anorg. allg. Chem.*, 2002, **628**, 1821.
- 10 S. C. Meier, A. Holz, J. Kulenkampff, A. Schmidt, D. Kratzert, D. Himmel, D. Schmitz, E.-W. Scheidt, W. Scherer, C. Bülow, M. Timm, R. Lindblad, S. T. Akin, V. Zamudio-Bayer, B. v. Issendorff, M. A. Duncan, J. T. Lau and I. Krossing, *Angew. Chem. Int. Ed.*, 2018, **57**, 9310.
- 11 M. Piesch, S. Reichl, C. Riesinger, M. Seidl, G. Balazs and M. Scheer, *Chem. Eur. J.*, 2021, **27**, 9129.
- 12 Agilent Technologies Ltd, *CrysAlis PRO*, Yarnton, Oxfordshire, England, 2014.
- 13 O. V. Dolomanov, L. J. Bourhis, R. J. Gildea, J. A. K. Howard and H. Puschmann, *J. Appl. Crystallogr.*, 2009, **42**, 339.
- 14 G. M. Sheldrick, *Acta Cryst. A* 2015, **71**, 3.
- 15 a) G. M. Sheldrick, *Acta Cryst. A* 2008, **64**, 112; b) G. M. Sheldrick, *Acta Cryst. C*, 2015, **71**, 3.
- 16 a) F. Neese, F. Wennmo, U. Becker and C. Rieplinger, *J. Chem. Phys.*, 2020, **152**, 224108; b) F. Neese, *WIREs Comput. Mol. Sci.*, 2022, **12**, 1606.
- 17 Y.-S. Lin, G.-D. Li, S.-P. Mao and J. D. Chai, *J. Chem. Theory Comput.*, 2013, **9**, 263.
- 18 F. Weigend and R. Ahlrichs, *Phys. Chem. Chem. Phys.*, 2005, **7**, 3297.
- 19 J. Tomasi, B. Mennucci and R. Cammi, *Chem. Rev.*, 2005, **105**, 2999.
